# Supplementary material for: Chromosome rearrangements, recombination suppression, and limited segregation distortion in hybrids between Yellowstone cutthroat trout (Oncorhynchus clarkii bouvieri) and rainbow trout (O. mykiss)
Source: PubMed Central journal article supplement (PMC3765842; doi:10.1186/1471-2164-14-570), 2013-08-22

Additional file 2. Parent-specific  $F_1$  hybrid linkage maps in  $p$  to  $q$  orientation and Yellowstone cutthroat trout (YCT) allele frequencies. Map distances (cM) represent the recombination fraction (theta) between loci. A 25 cM sliding window was used to identify blocks of loci containing YCT allele frequencies that deviated significantly from expected frequencies. Yellowstone cutthroat trout allele frequencies are plotted for each locus mapped within linkage groups. \* indicates  $P < 0.05$  and \*\* indicates  $P < 0.01$ .

# RYHyb01

Female 1

YCT allele frequency

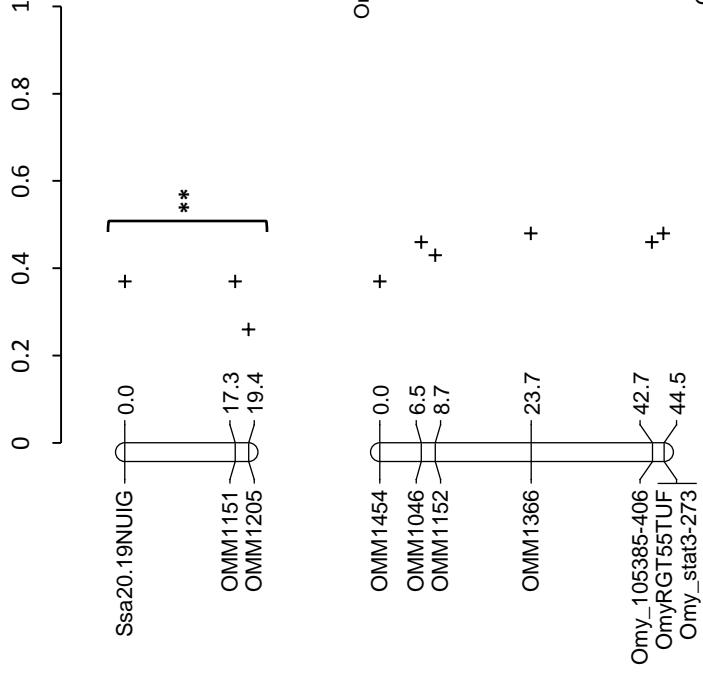

Female 2

YCT allele frequency

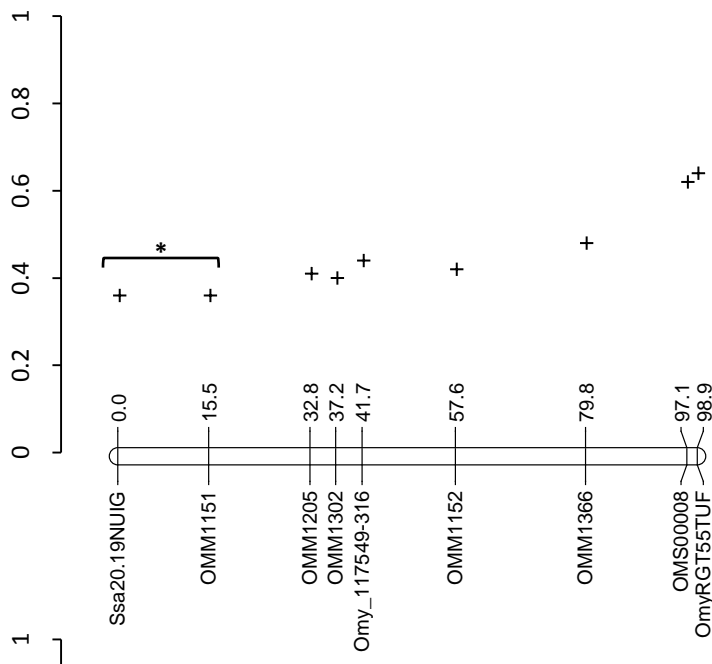

Male 1

YCT allele frequency

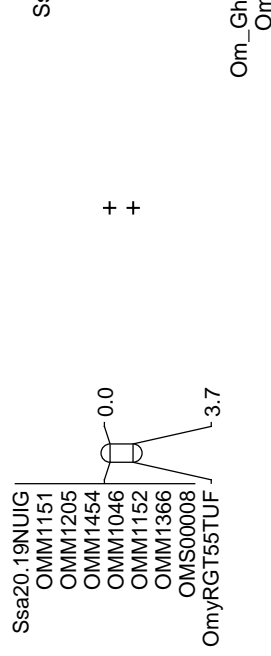

Male 2

YCT allele frequency

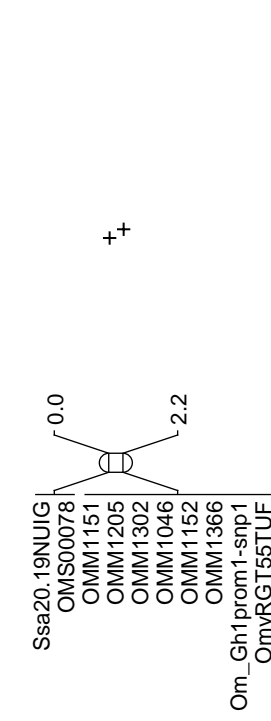

# RYHyb02

Female 1

YCT allele frequency

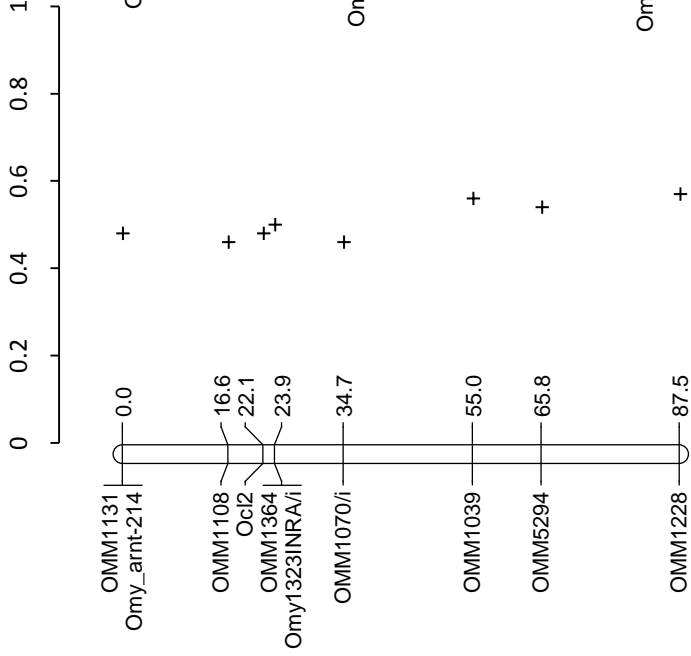

Female 2

YCT allele frequency

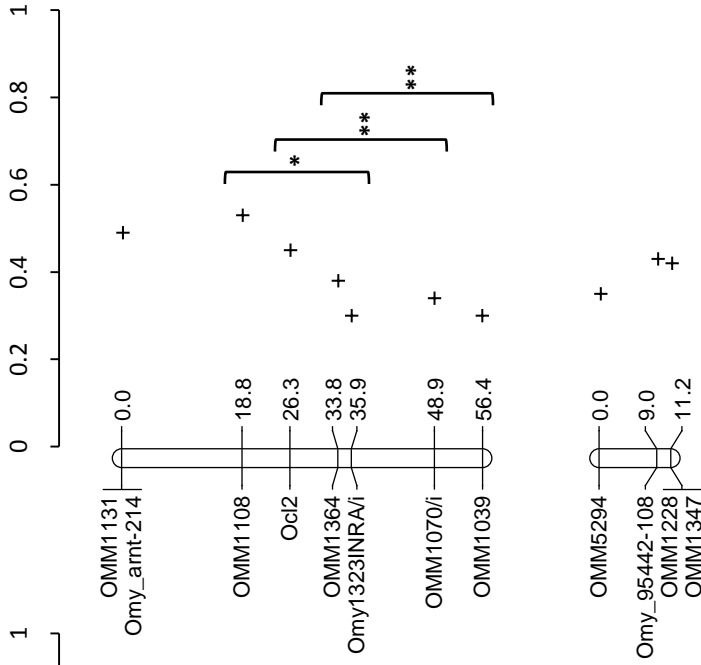

Male 1

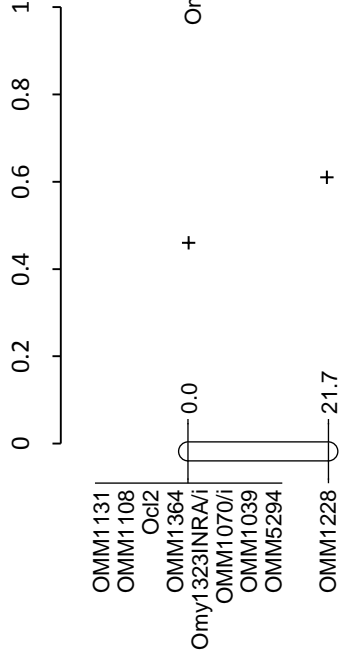

Male 2

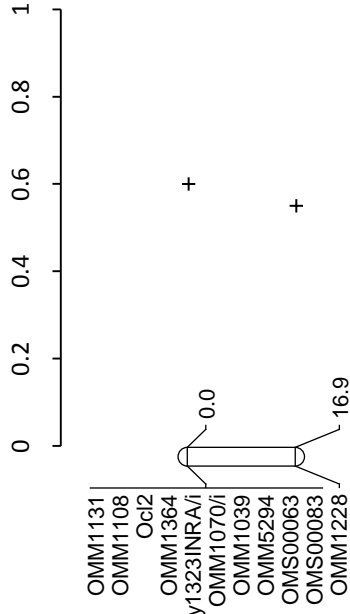

# RYHyb03

Female 1

YCT allele frequency

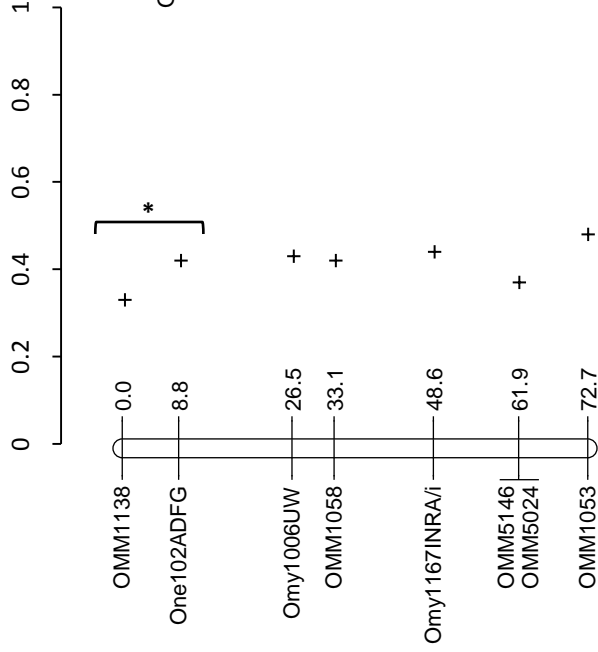

Female 2

YCT allele frequency

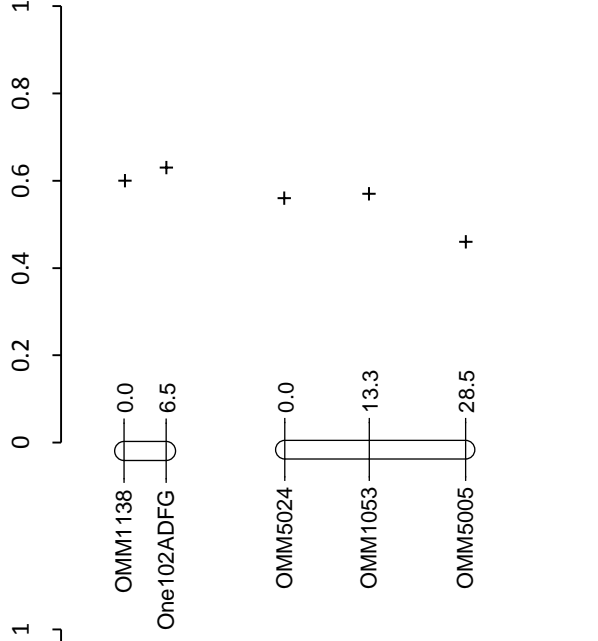

Male 1

YCT allele frequency

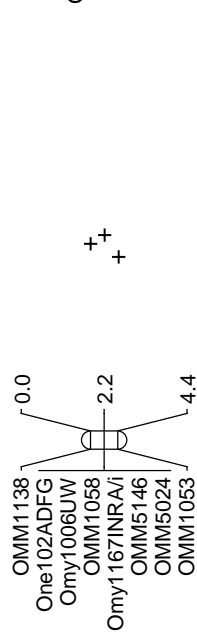

Male 2

YCT allele frequency

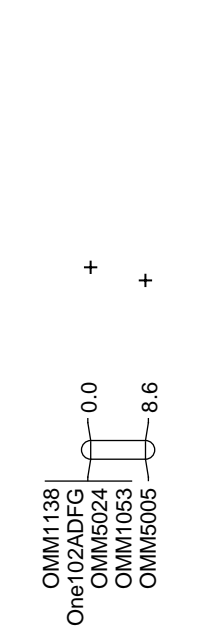

# RYHyb04

Female 1

YCT allele frequency

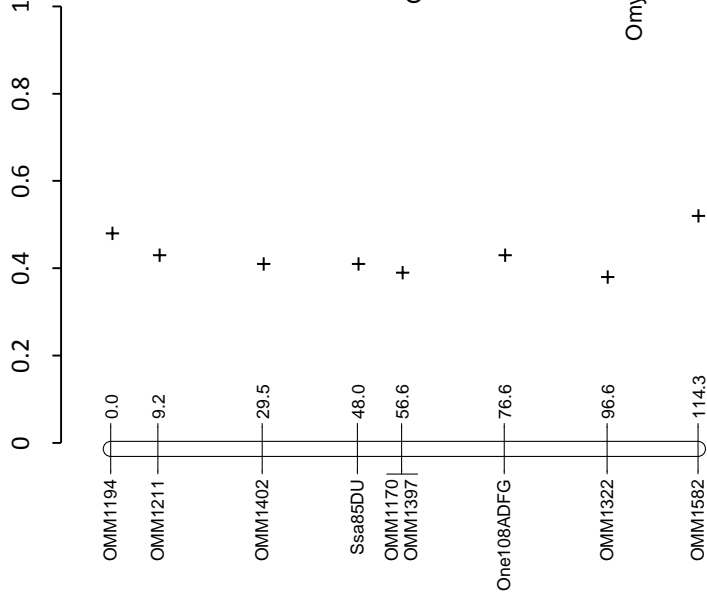

Female 2

YCT allele frequency

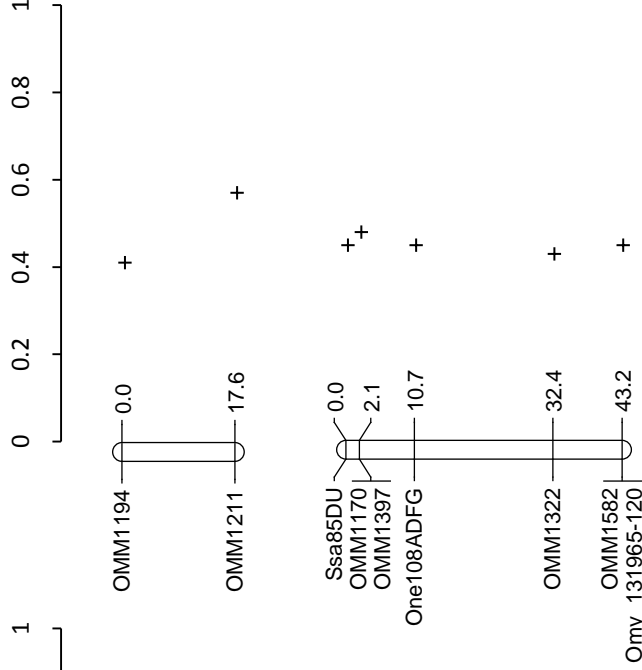

M1le 3

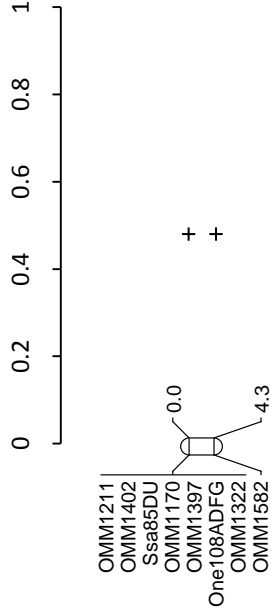

Male 2

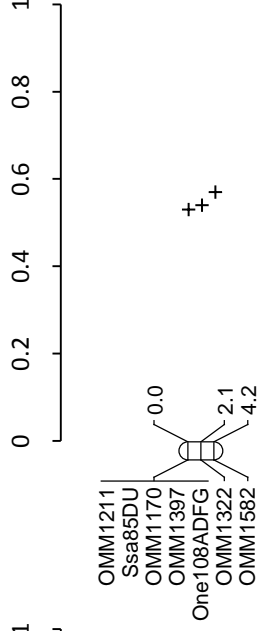

# RYHyb05

Female 1

YCT allele frequency

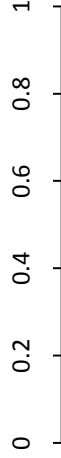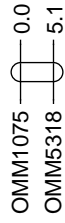

+ +

Female 2

YCT allele frequency

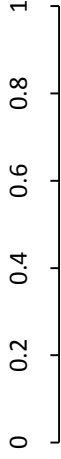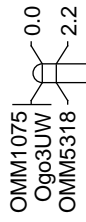

+ +

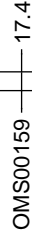

+

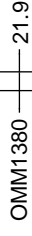

+

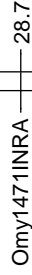

+

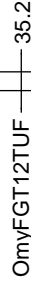

+

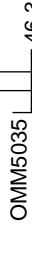

+

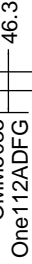

+

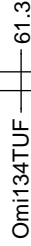

+

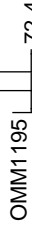

+

Male 1

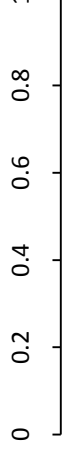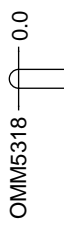

+

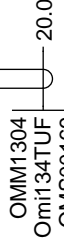

+

Male 2

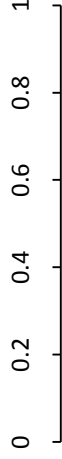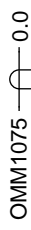

+

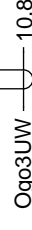

+

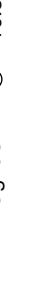

+

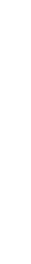

+

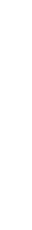

+

+

+

\*

\*\*

# RYHyb06

Female 1

YCT allele frequency

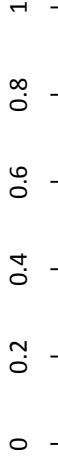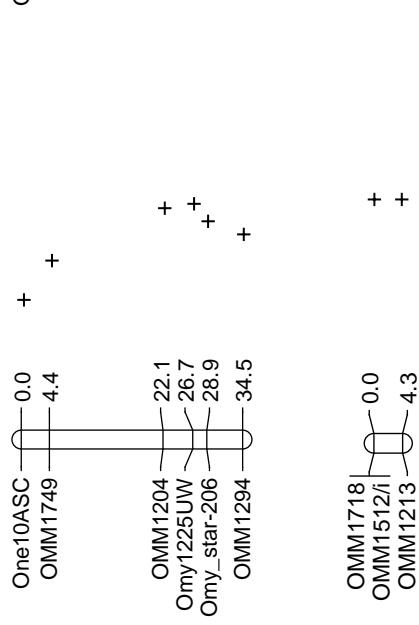

Female 2

YCT allele frequency

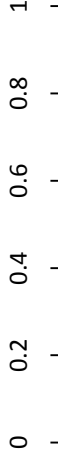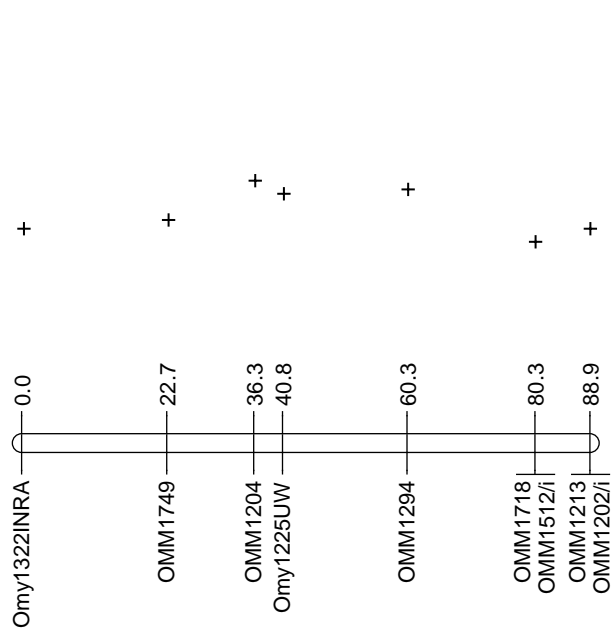

Male 1

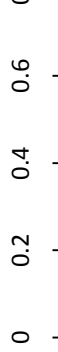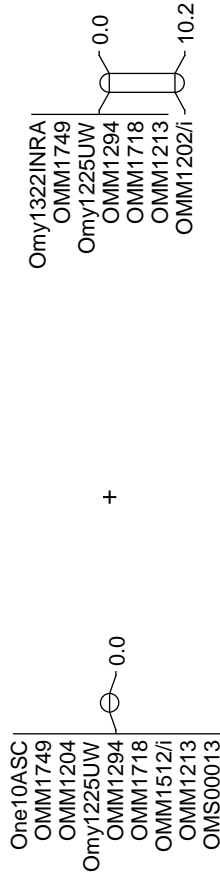

Male 2

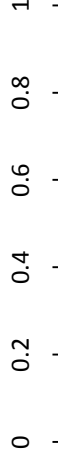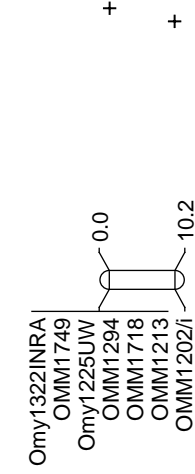

# RHYb07

Female 1

YCT allele frequency

Female 2

YCT allele frequency

Female 1 linkage map not generated

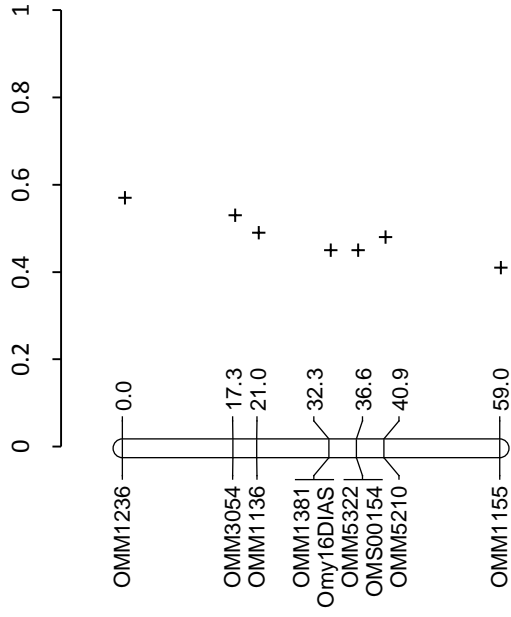

Male 1

YCT allele frequency

Male 2

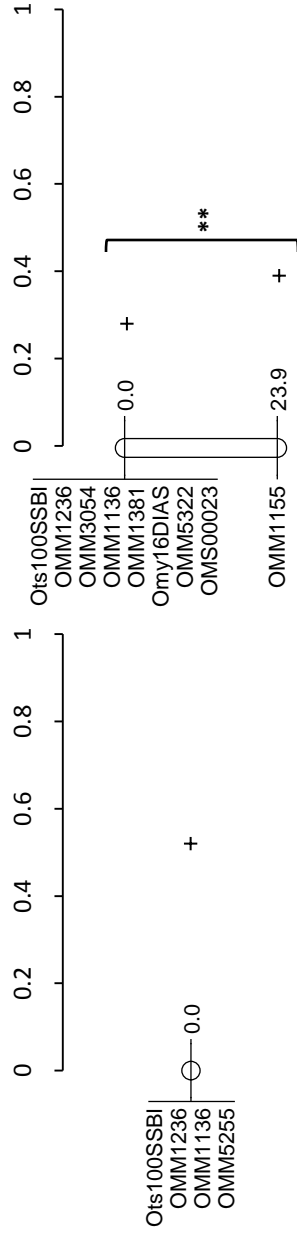



# RYHyb08

Female 1

YCT allele frequency

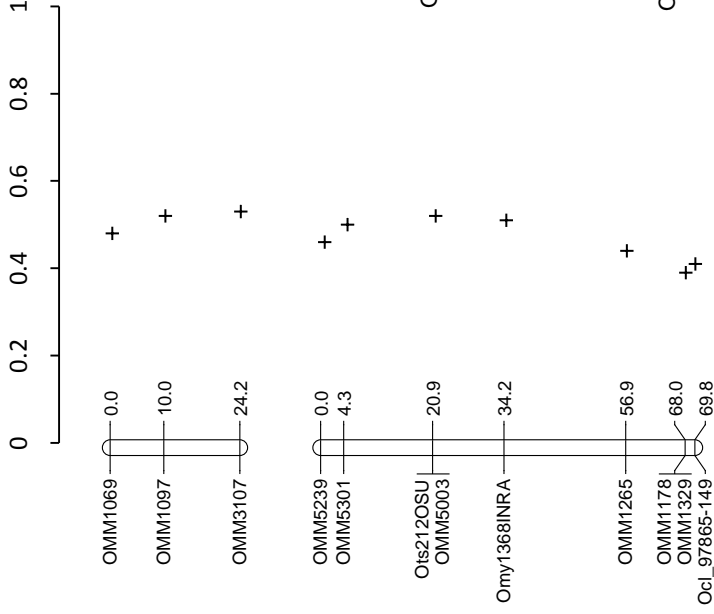

Female 2

YCT allele frequency

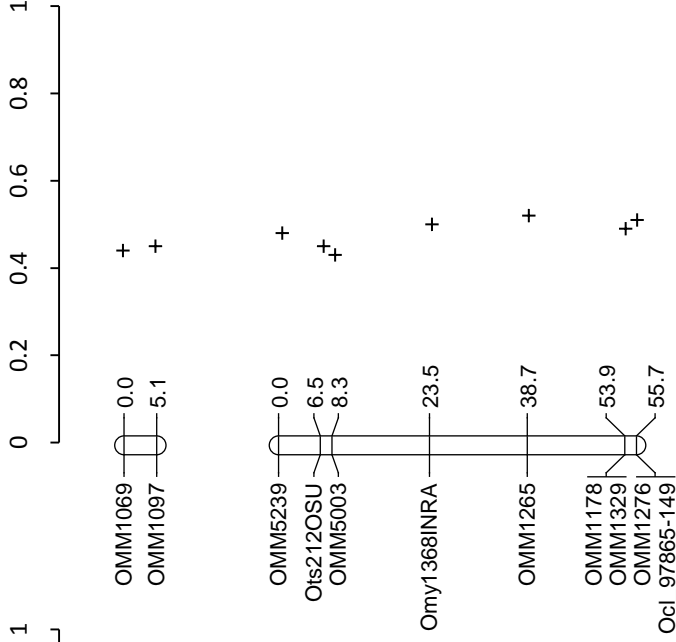

Male 1

YCT allele frequency

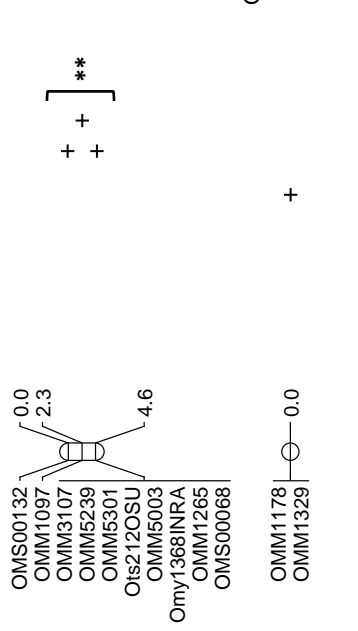

Male 2

YCT allele frequency

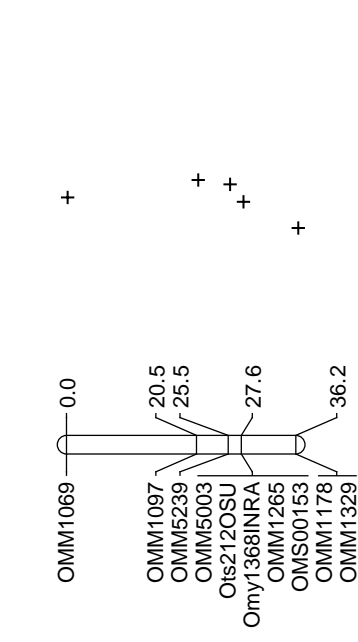

# RYHyb09

Female 1

YCT allele frequency

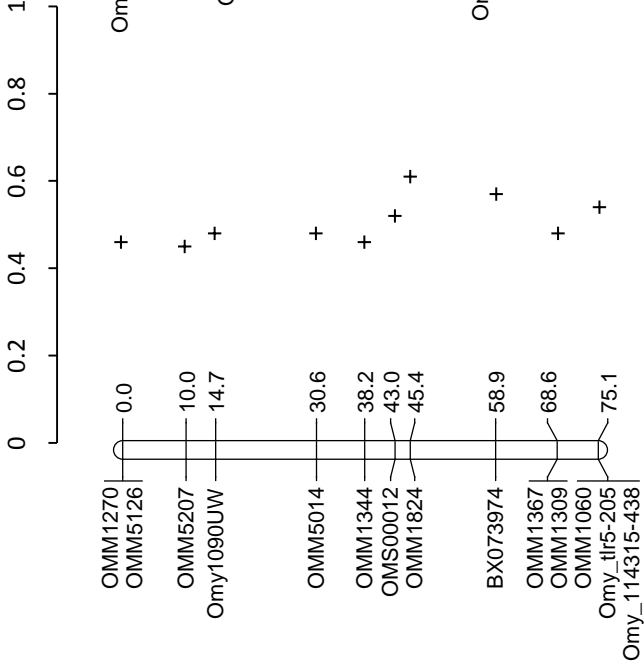

Female 2

YCT allele frequency

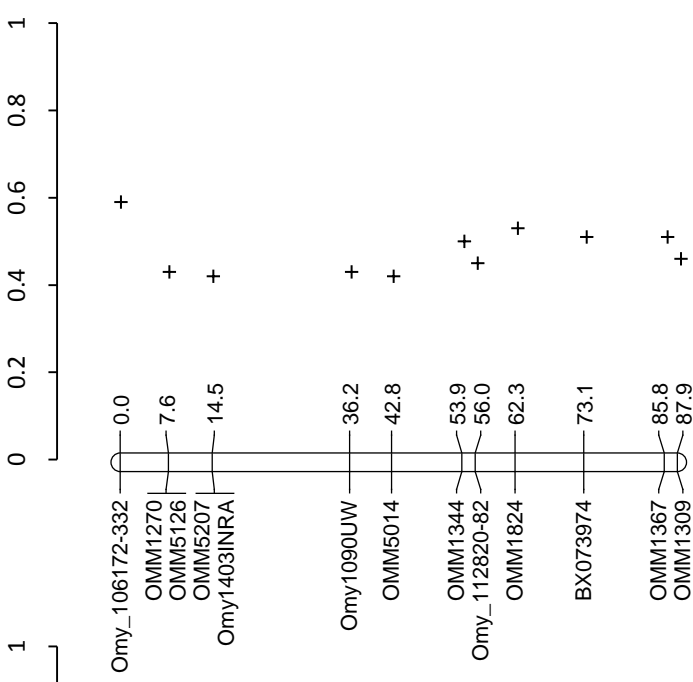

Male 1

YCT allele frequency

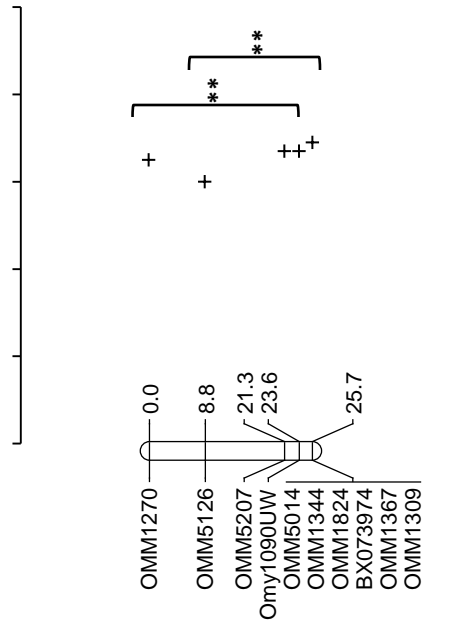

Male 2

YCT allele frequency

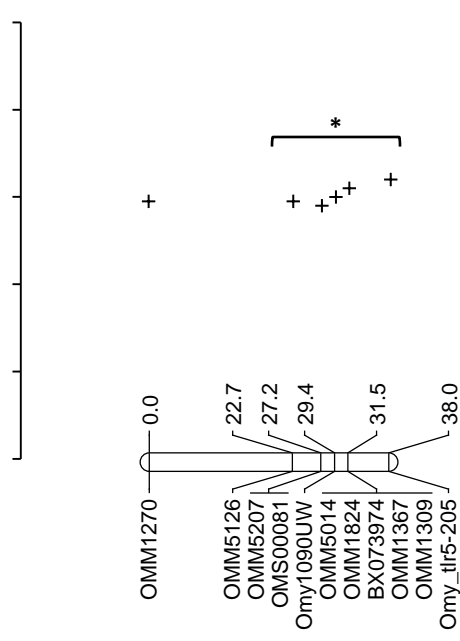

# RYHyb10

Female 1

YCT allele frequency

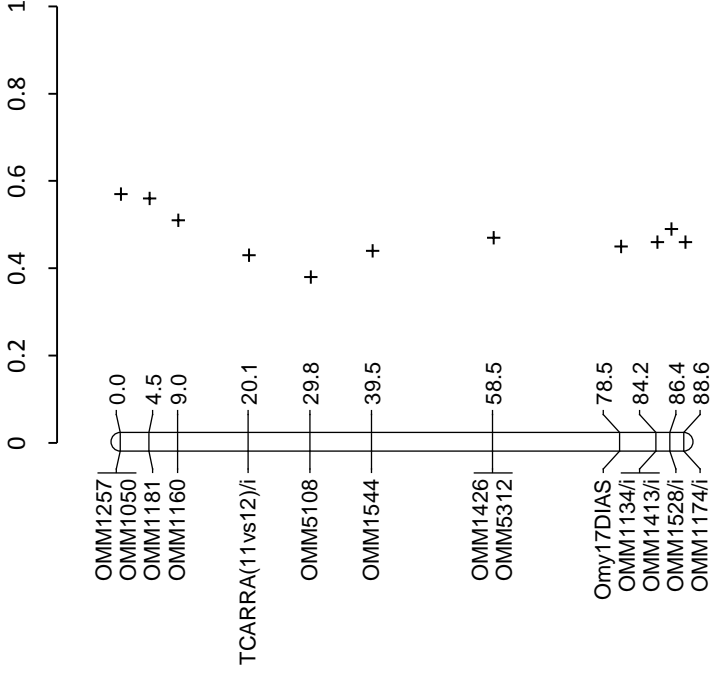

Female 2

YCT allele frequency

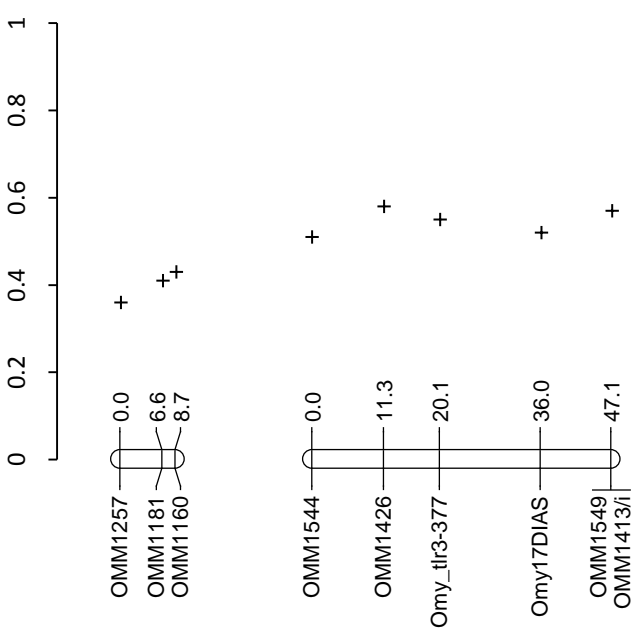

Male 1

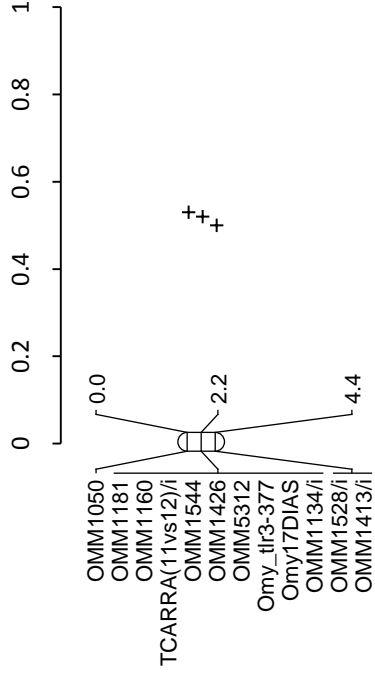

Male 2

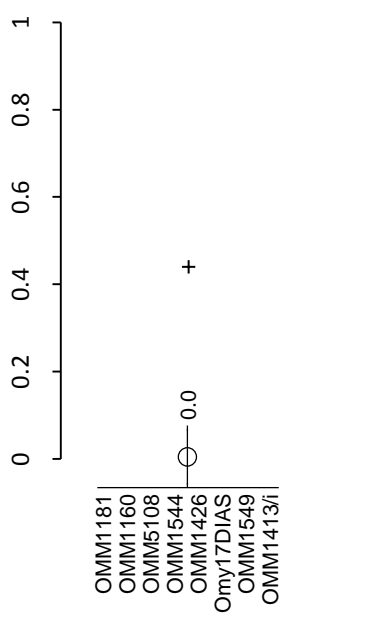

# RYHyb11

Female 1

YCT allele frequency

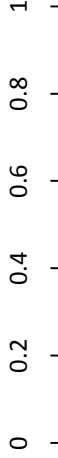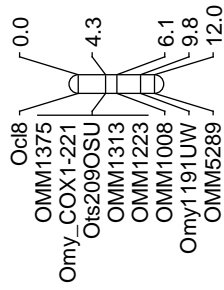

Female 2

YCT allele frequency

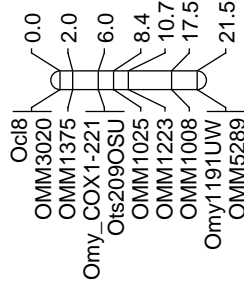

Male 1

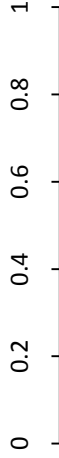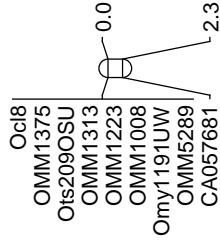

+ + ]\*

Male 2

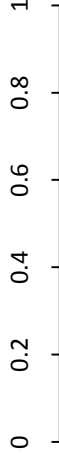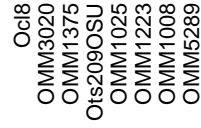

+

# RYHyb12

Female 1

YCT allele frequency

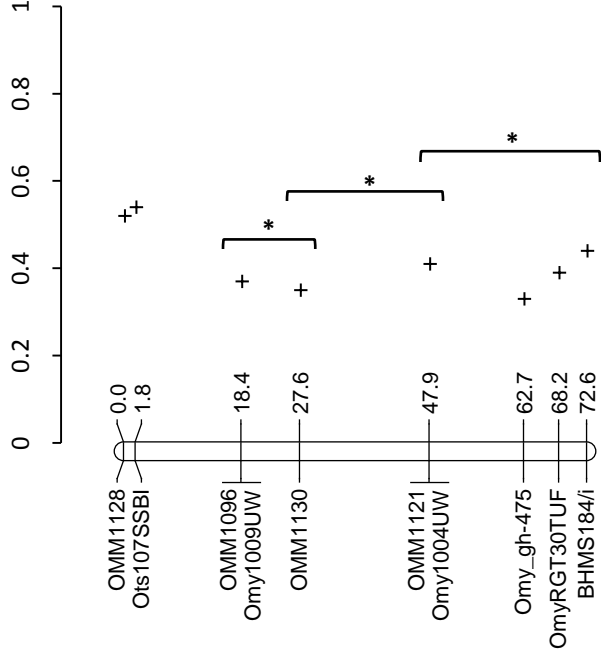

Female 2

YCT allele frequency

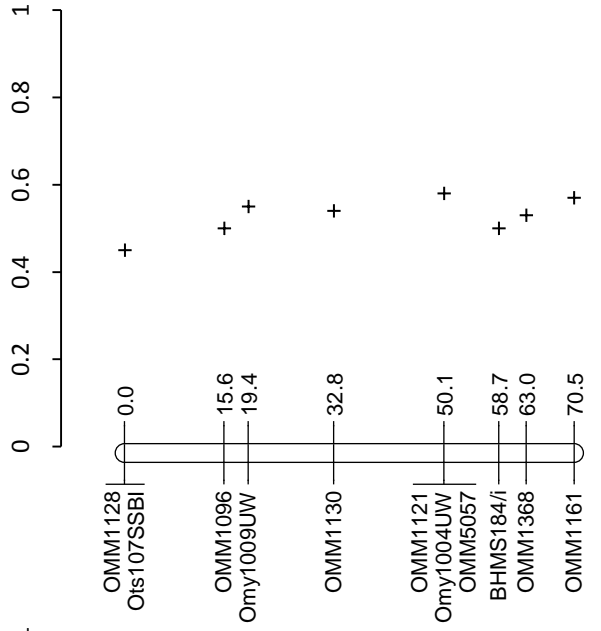

Male 1

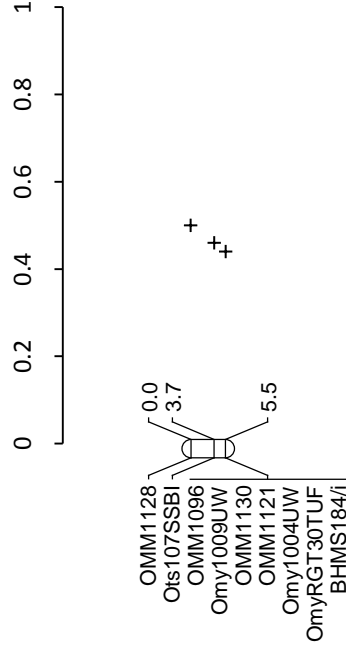

Male 2

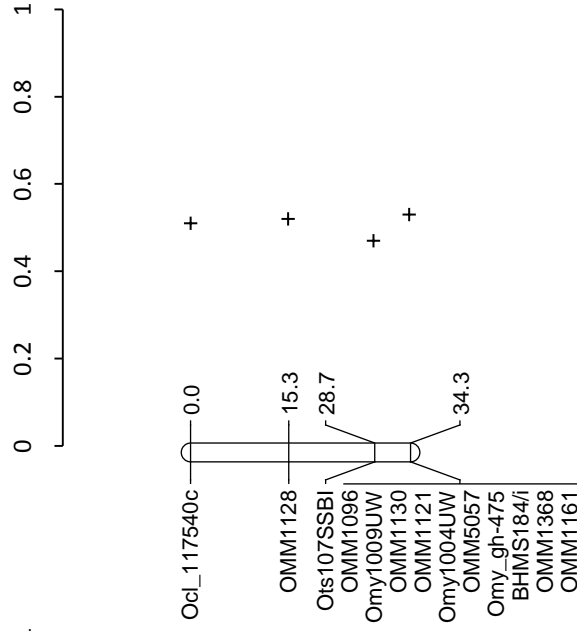

# RYHyb13

Female 1

YCT allele frequency

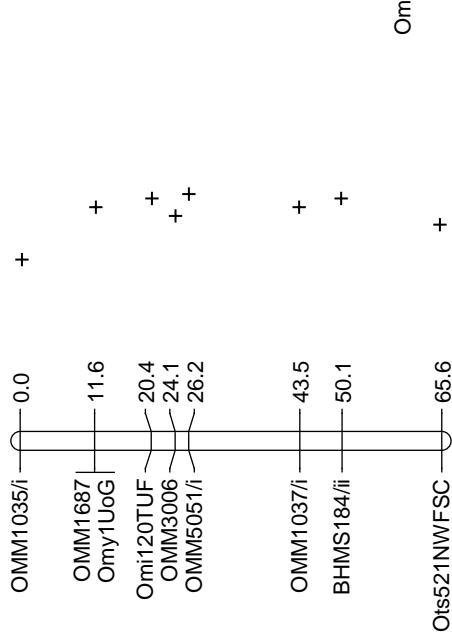

Female 2

YCT allele frequency

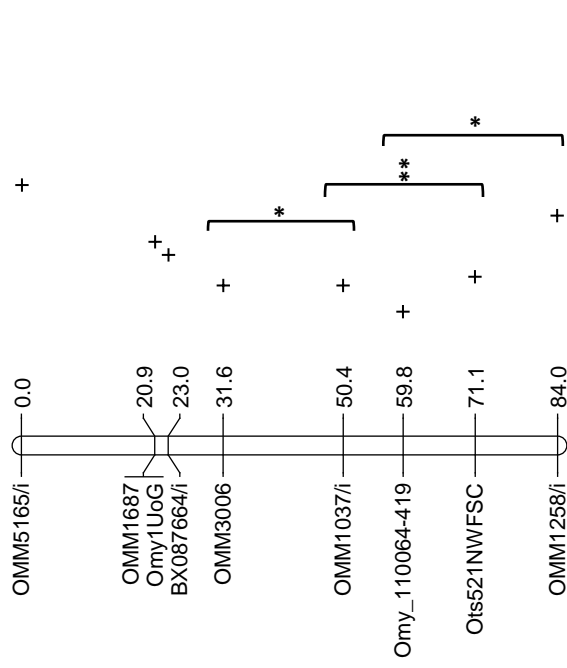

Male 1

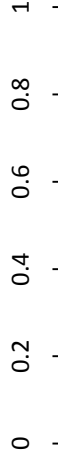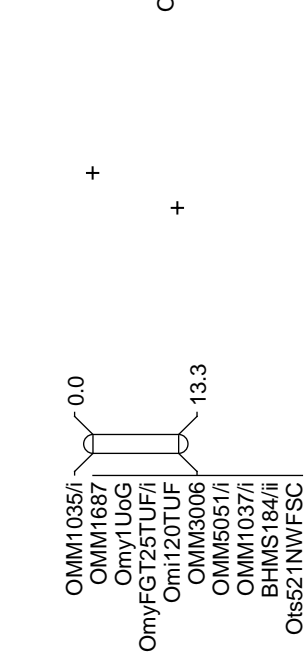

Male 2

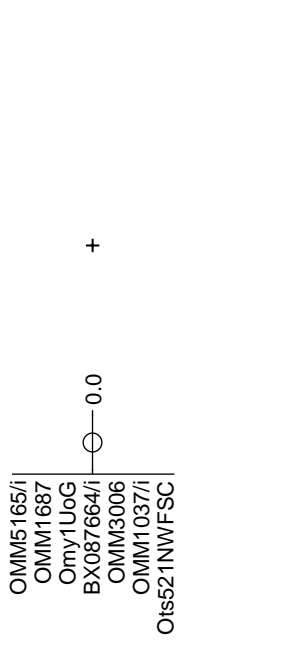

# RYHyb14

Female 1

YCT allele frequency

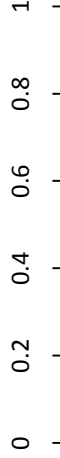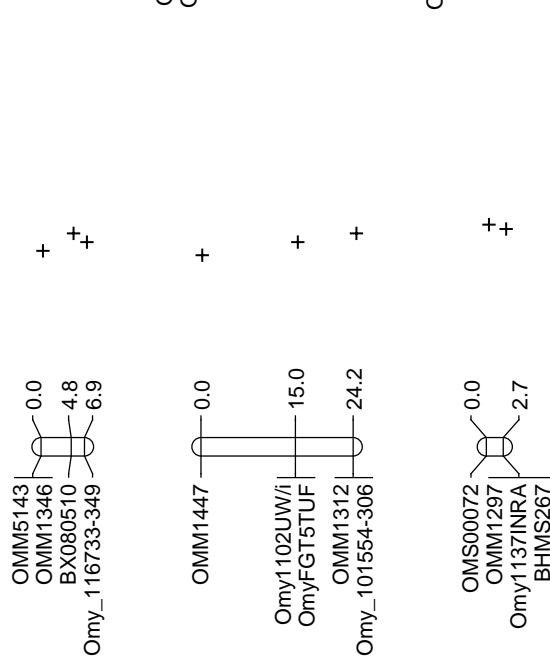

Female 2

YCT allele frequency

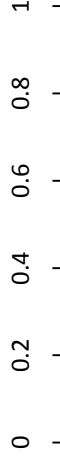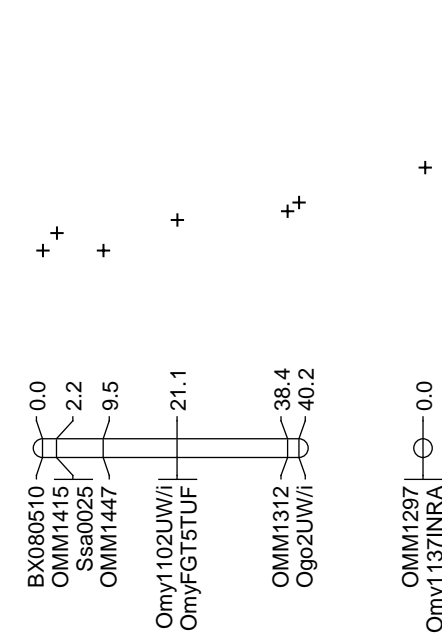

Male 1

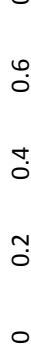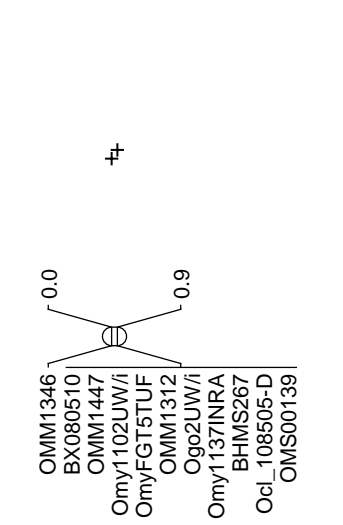

Male 2

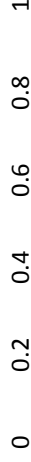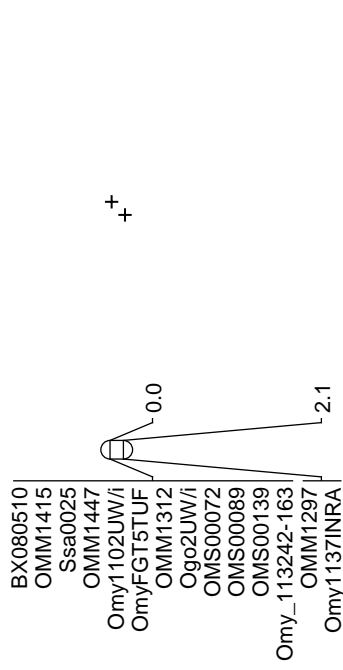

# RYHyb15

Female 1

YCT allele frequency

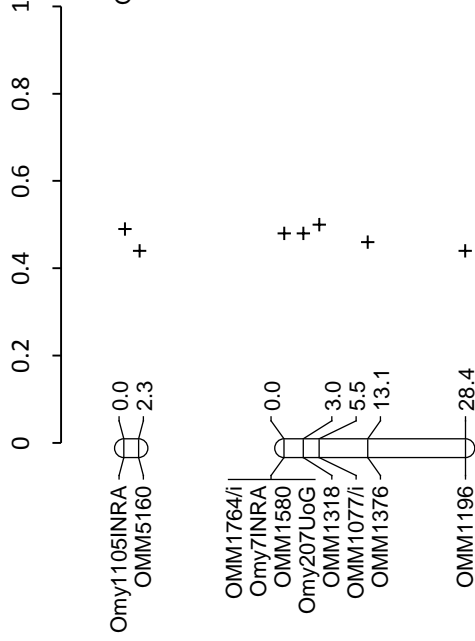

Female 2

YCT allele frequency

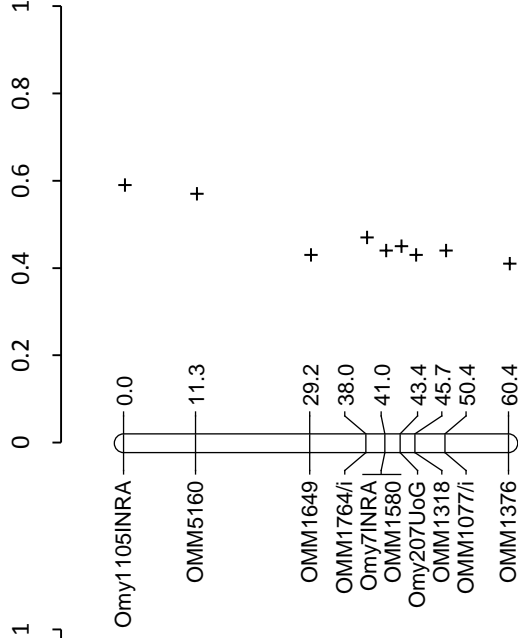

Male 1

YCT allele frequency

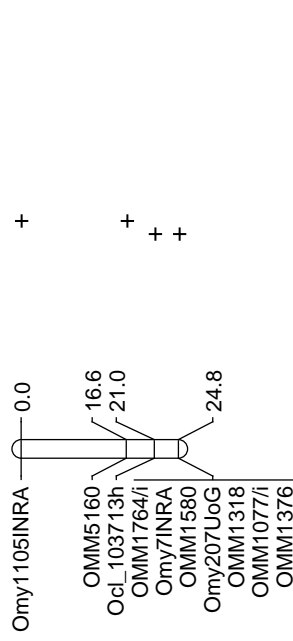

Male 2

YCT allele frequency

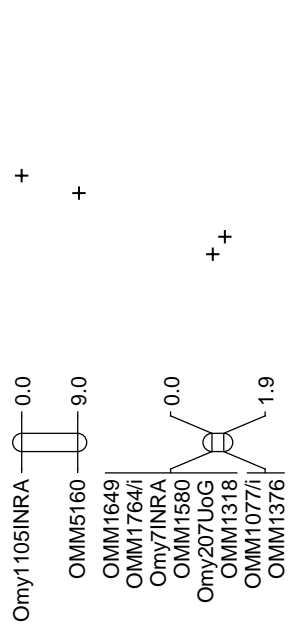



# RYHyb16

Female 1

YCT allele frequency

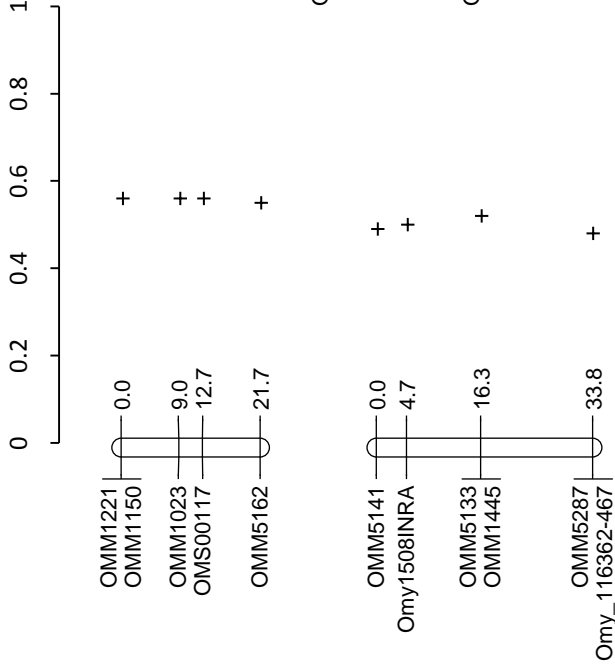

Female 2

YCT allele frequency

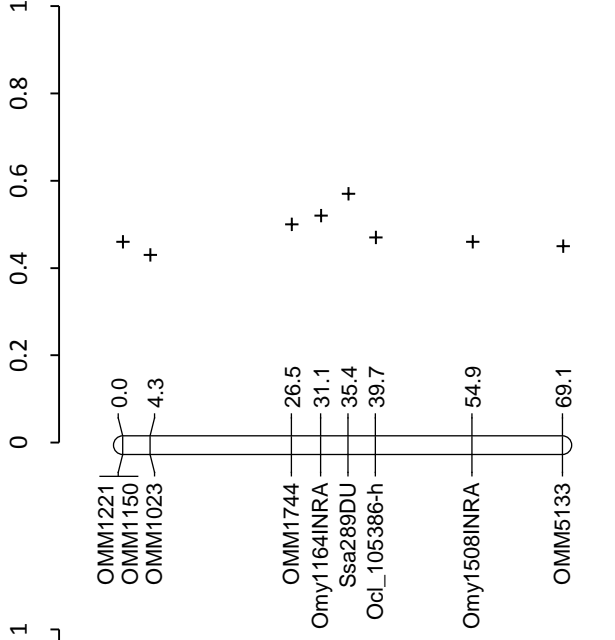

Male 1

YCT allele frequency

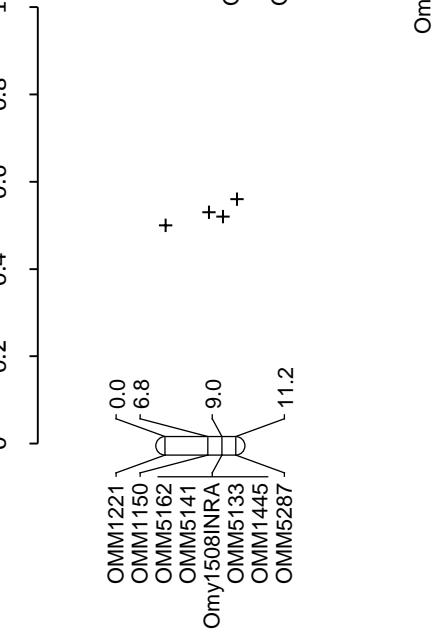

Male 2

YCT allele frequency

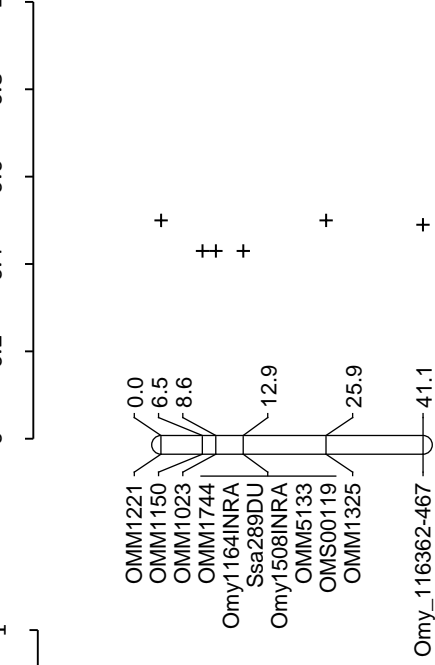

# RYHyb17

Female 1

YCT allele frequency

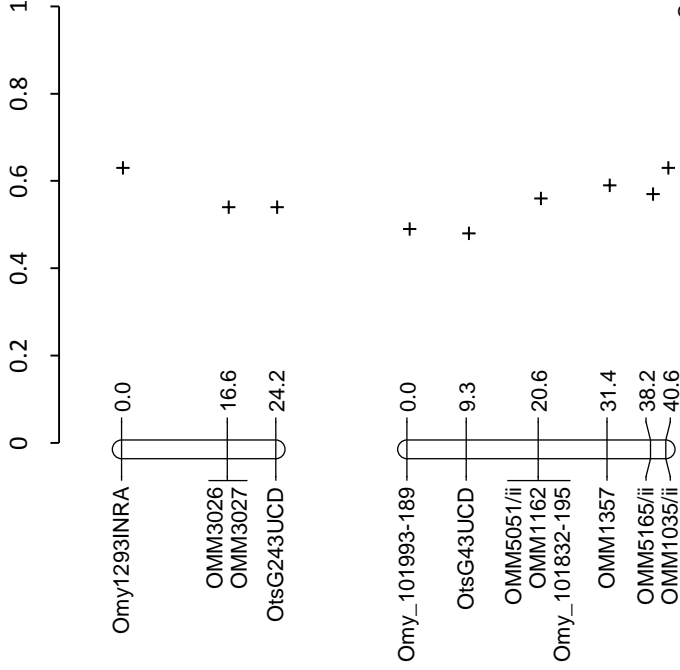

Female 2

YCT allele frequency

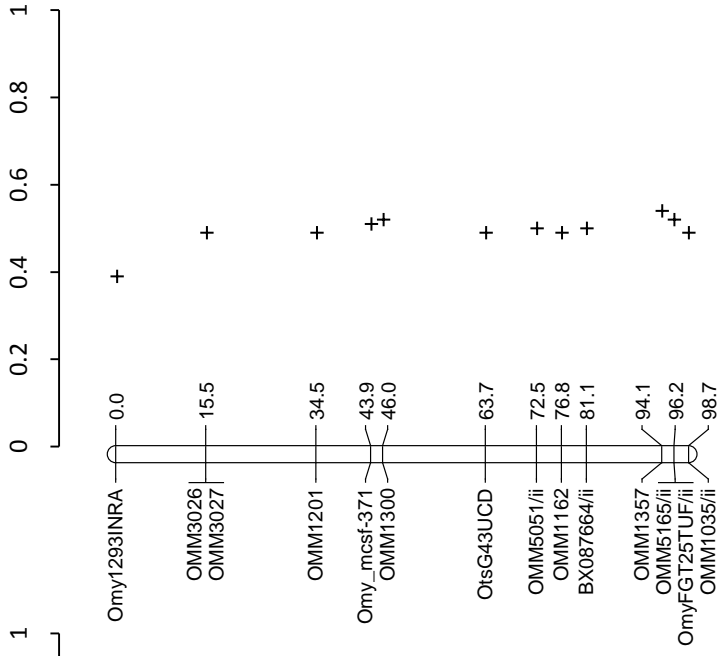

Male 1

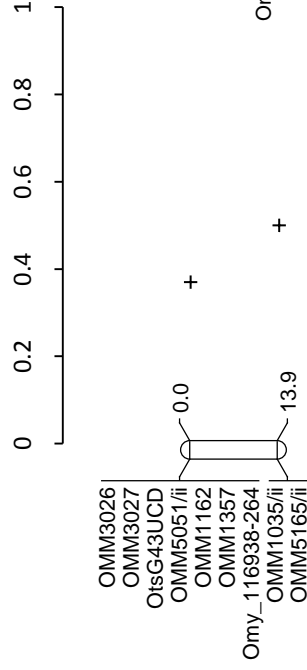

Male 2

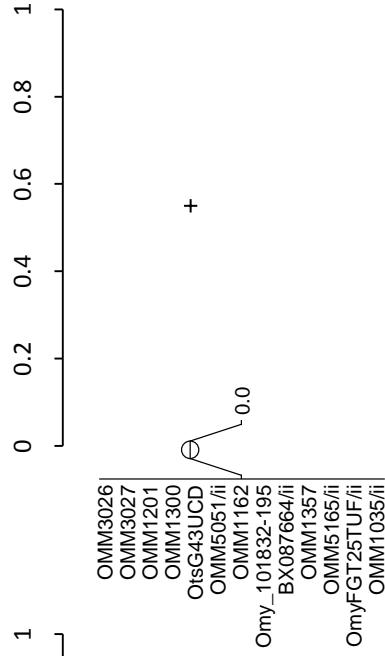

# RYHyb18

Female 1

YCT allele frequency

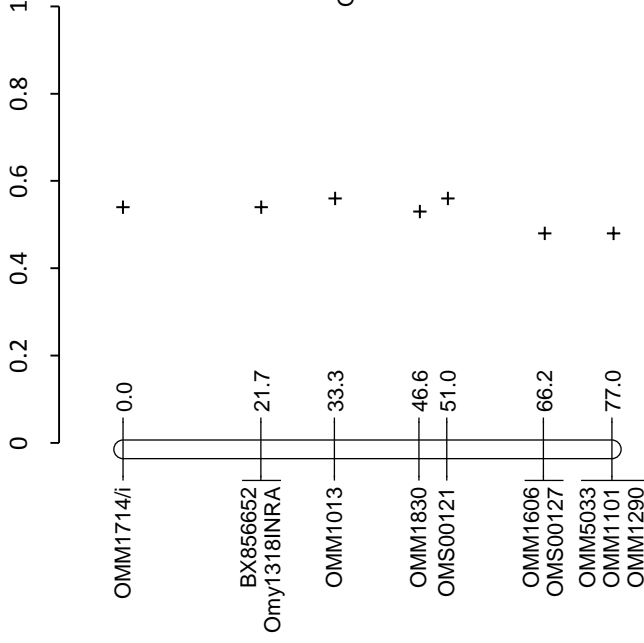

Female 2

YCT allele frequency

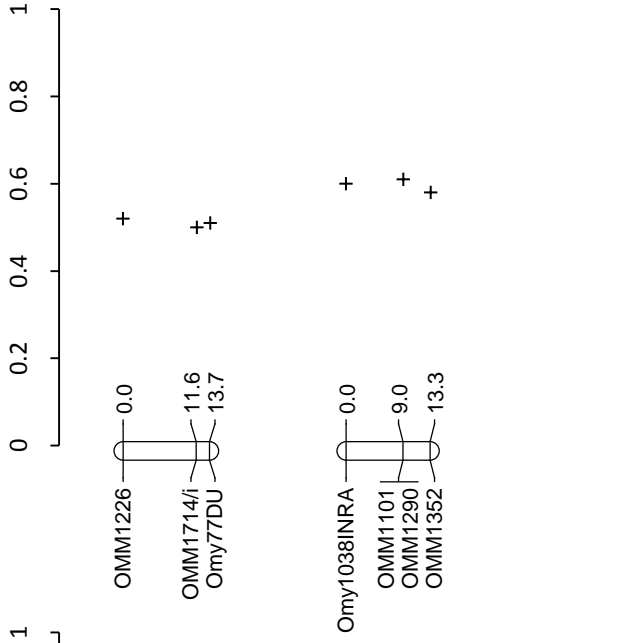

Male 1

YCT allele frequency

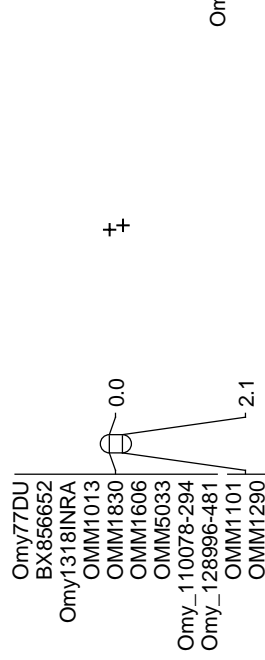

Male 2

YCT allele frequency

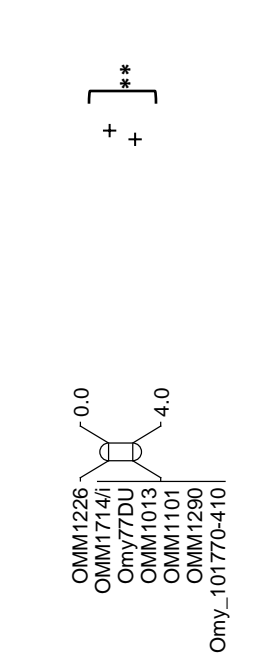

# RYHyb19

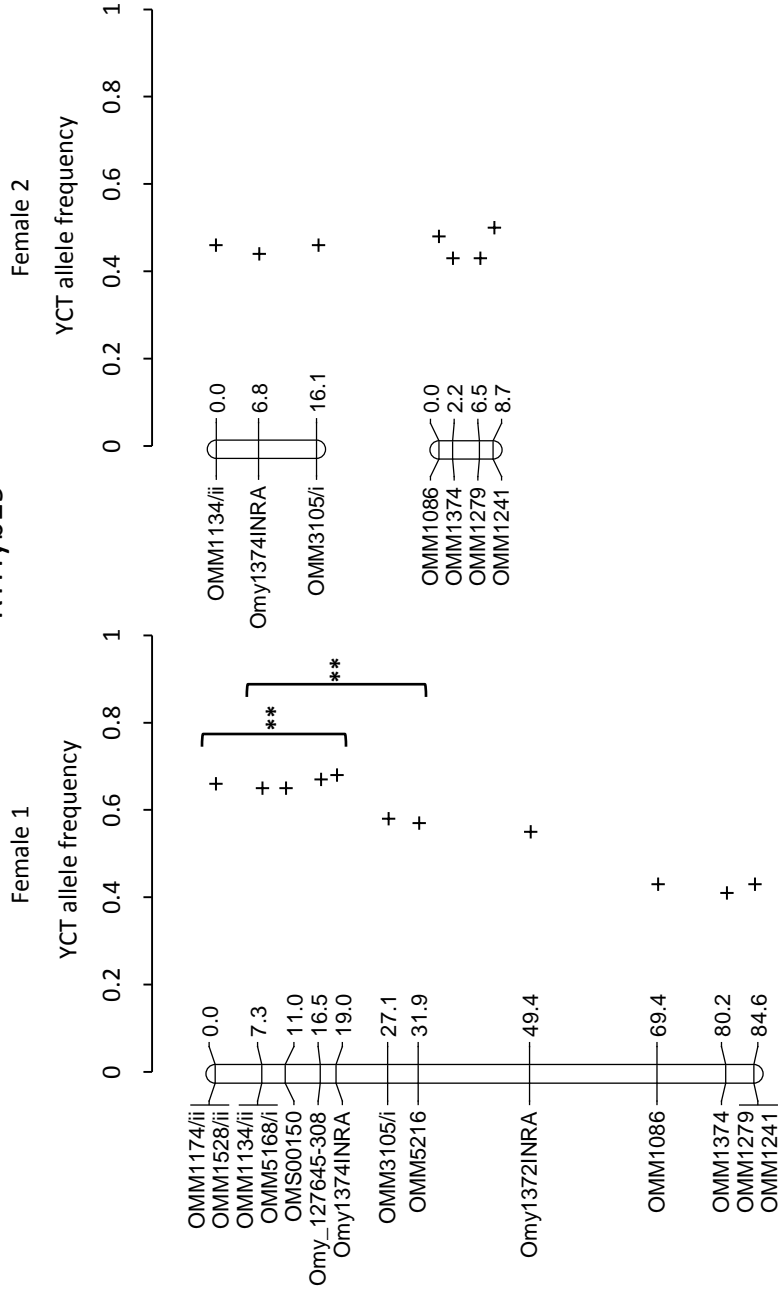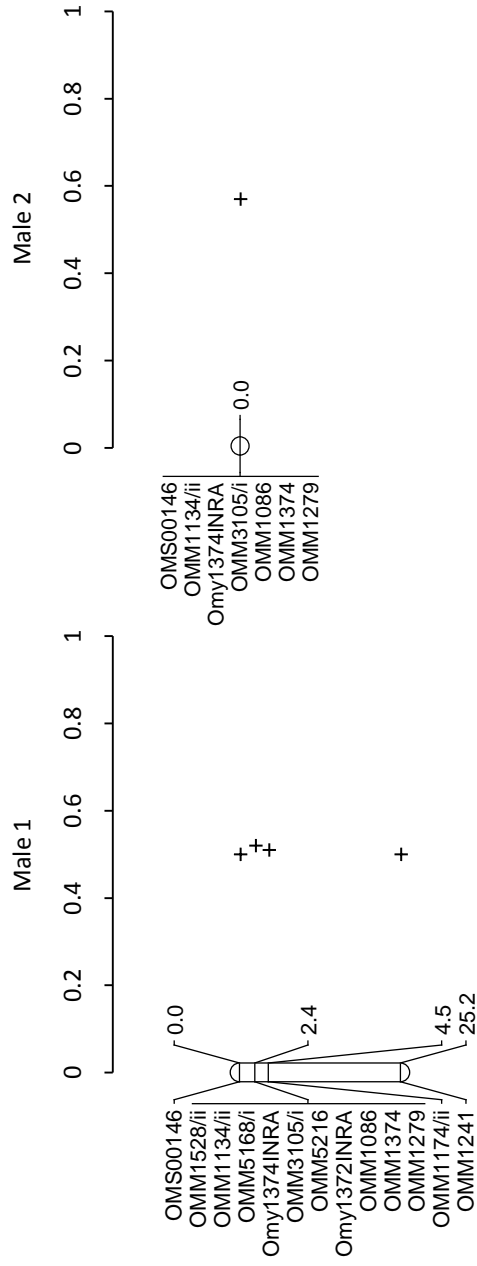

# RYHyb20

Female 1

YCT allele frequency

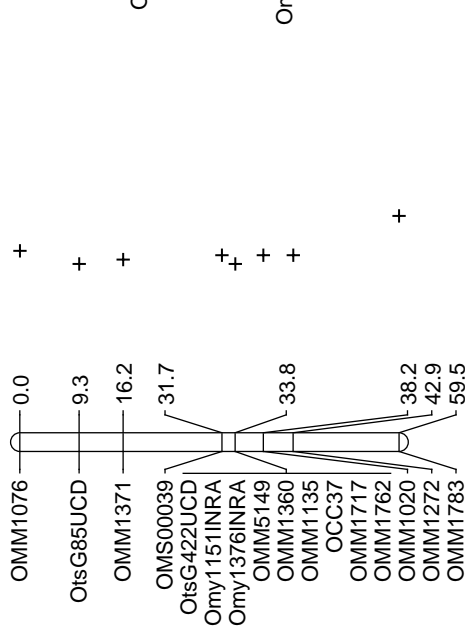

Female 2

YCT allele frequency

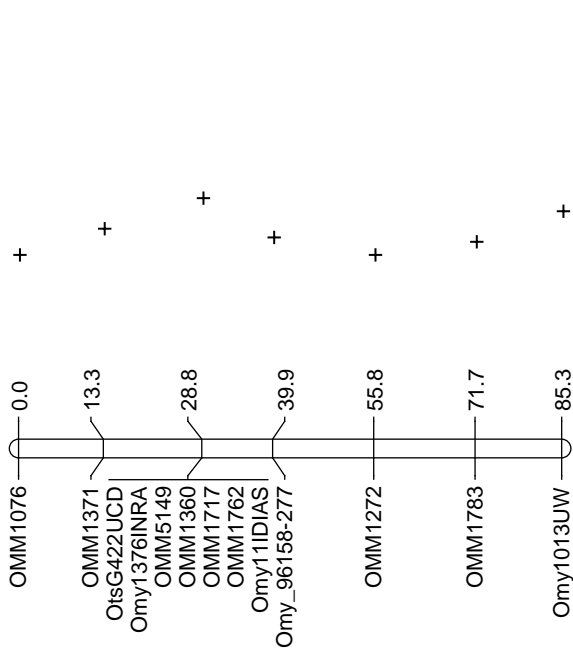

Male 1

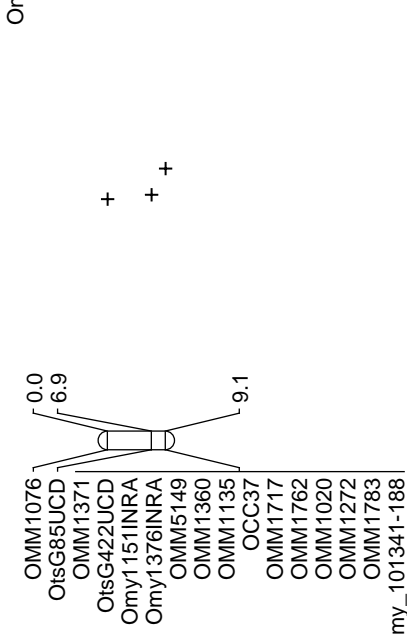

Male 2

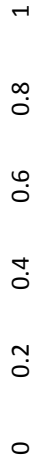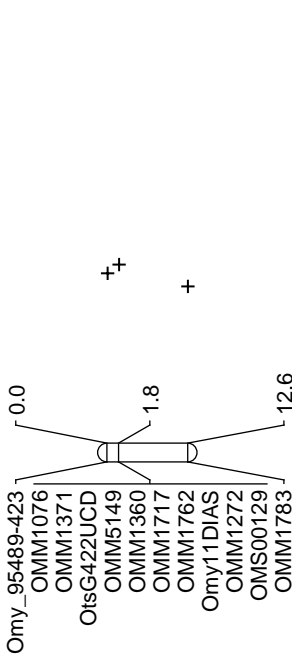

# RYHyb21

Female 1

YCT allele frequency

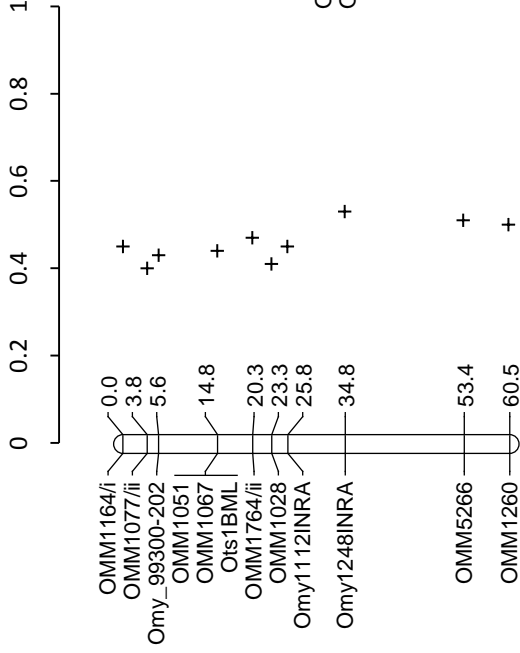

Female 2

YCT allele frequency

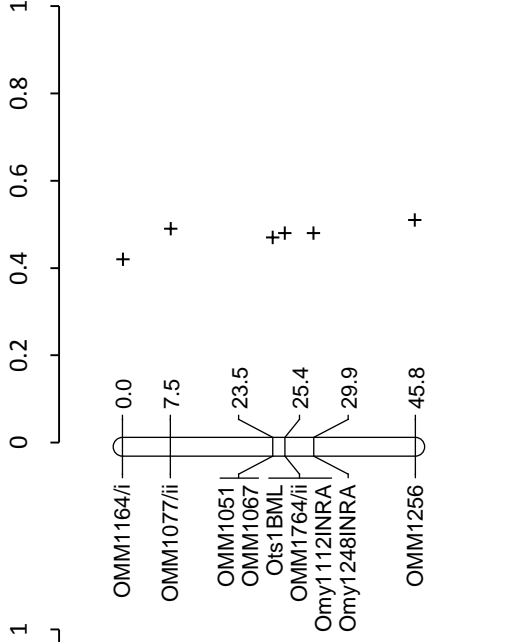

Male 1

YCT allele frequency

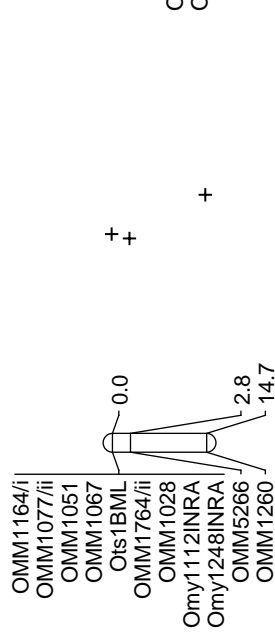

Male 2

YCT allele frequency

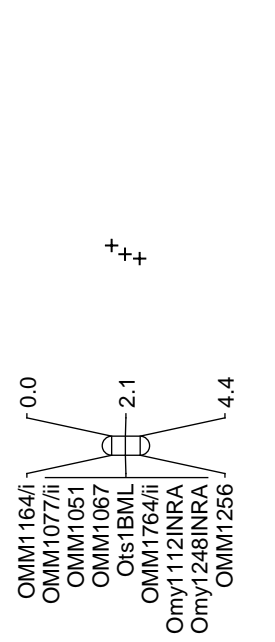

# RYHyb22

Female 1

YCT allele frequency

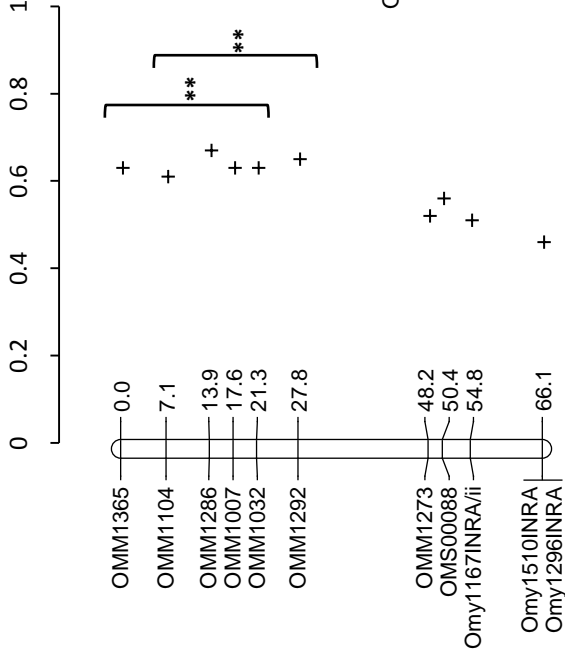

Female 2

YCT allele frequency

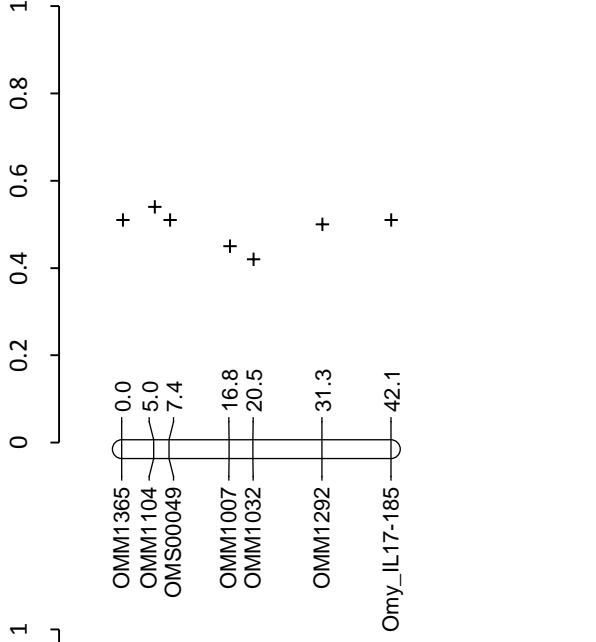

Male 1

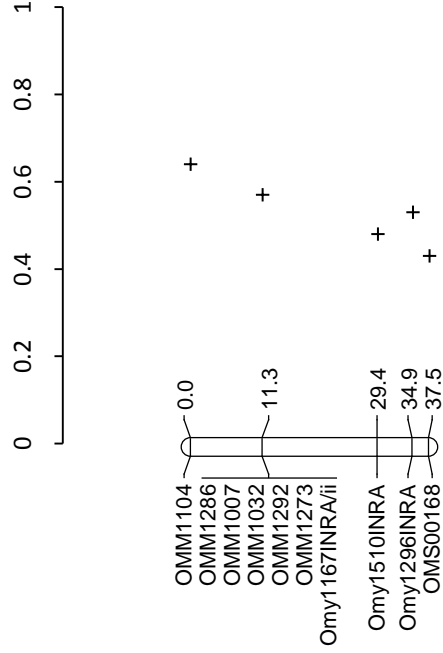

Male 2

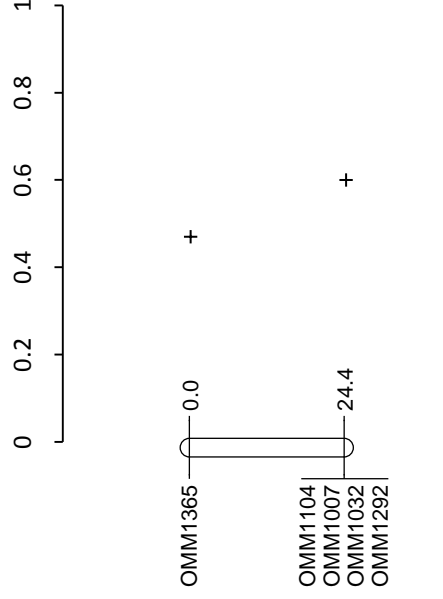

# RYHyb23

Female 1

YCT allele frequency

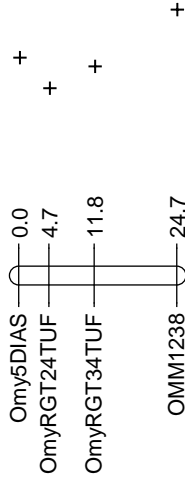

Female 2

YCT allele frequency

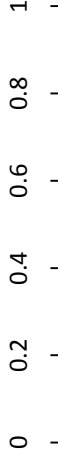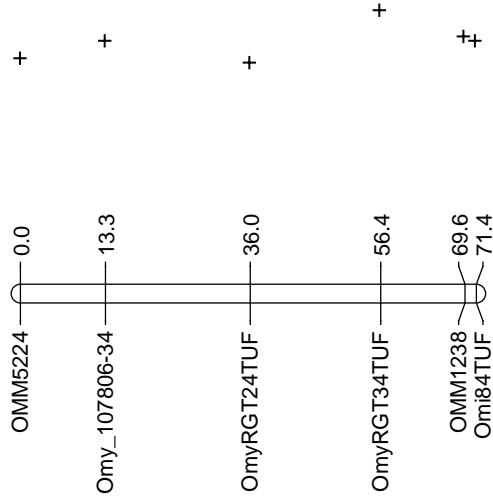

Male 1

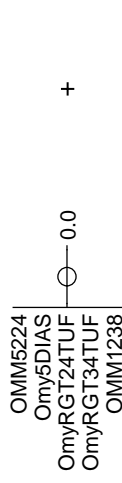

Male 2

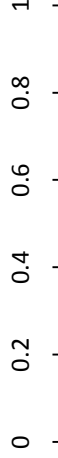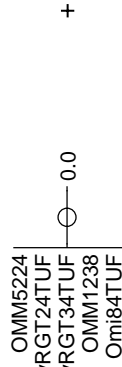



# RYHyb24

Female 1

YCT allele frequency

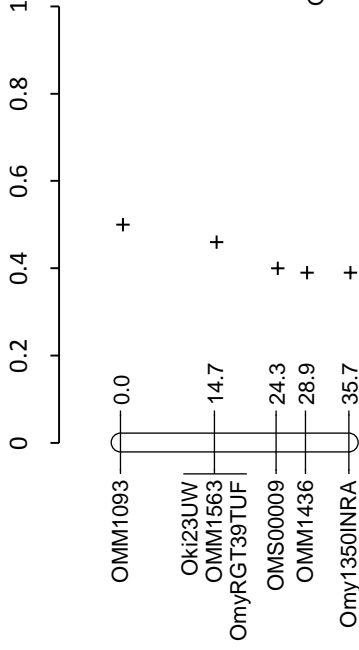

Female 2

YCT allele frequency

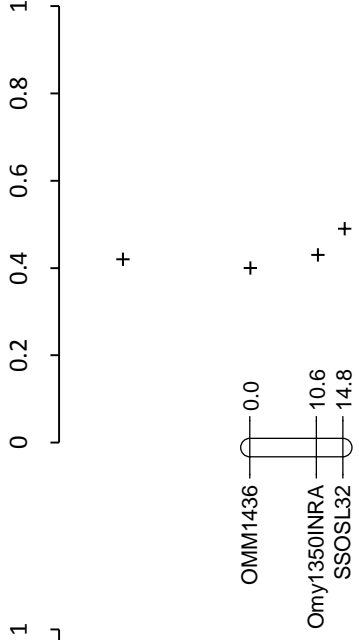

Male 1

YCT allele frequency

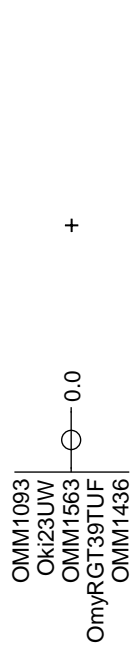

Male 2

YCT allele frequency

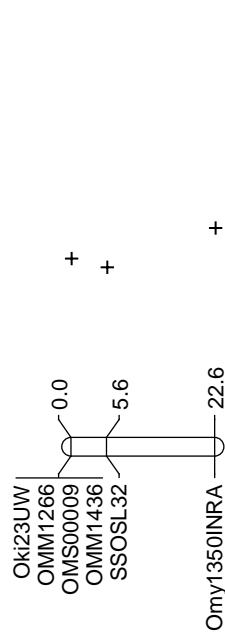

# RYHyb25 and RYHyb29 polymorphism

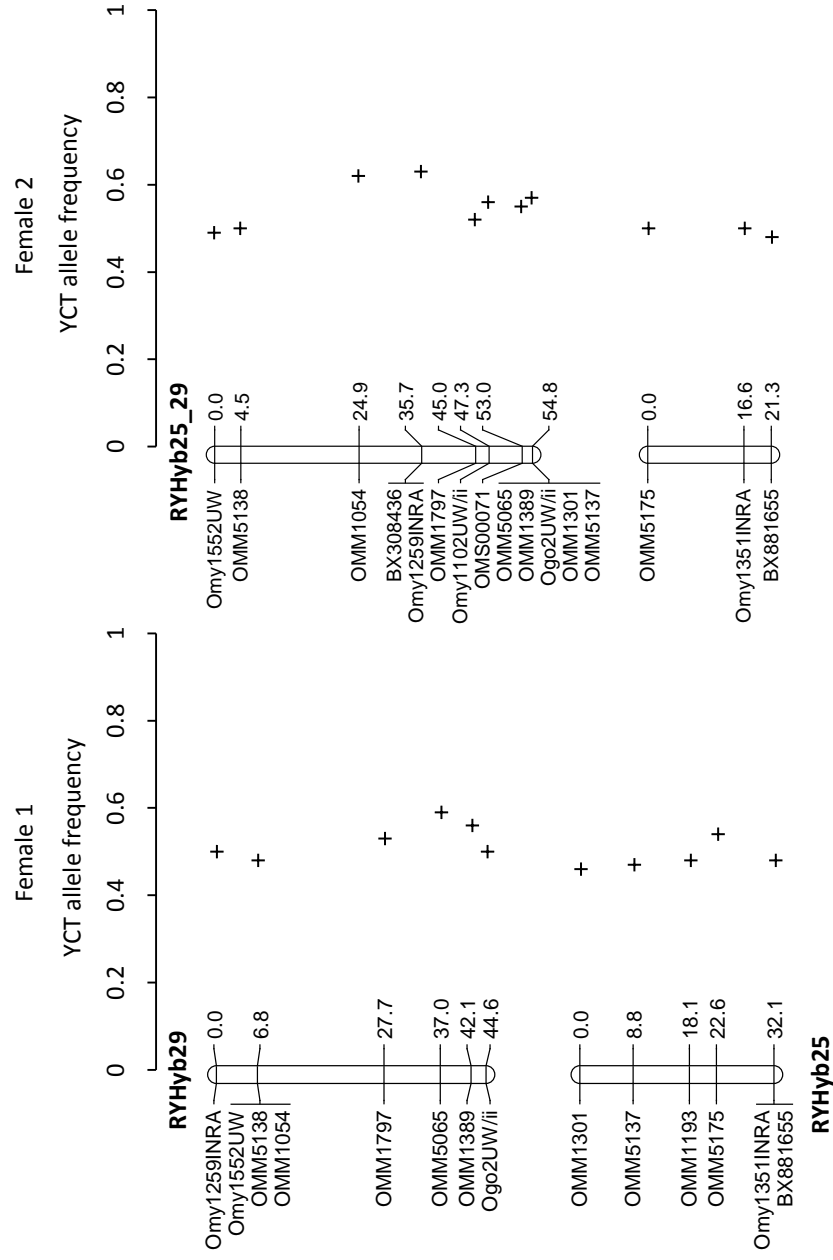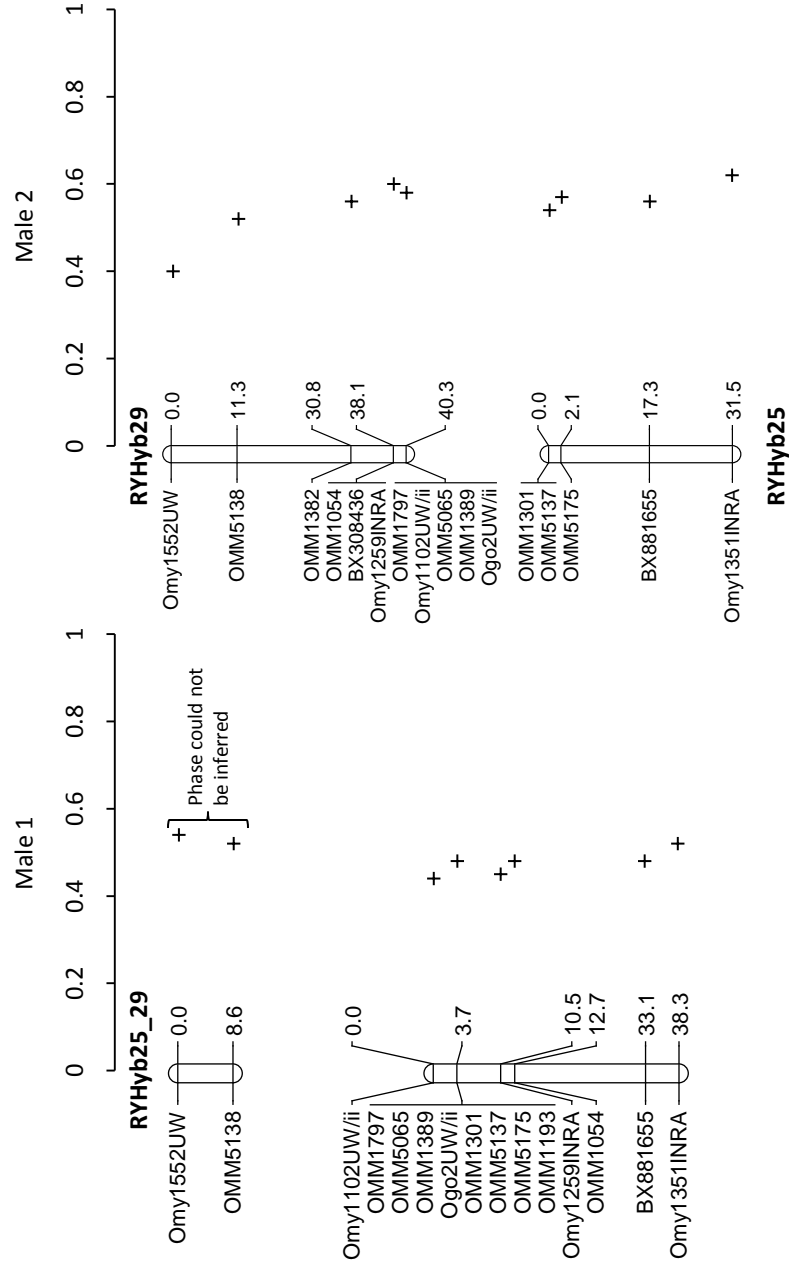

# RYHyb26

Female 1

YCT allele frequency

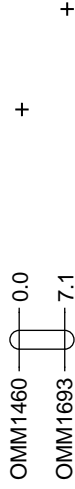

Female 2

YCT allele frequency

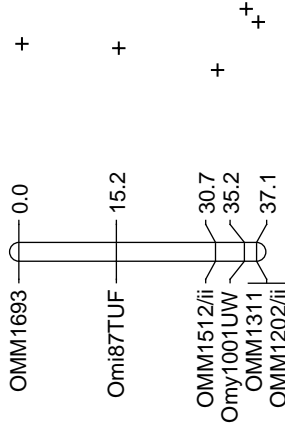

Male 1

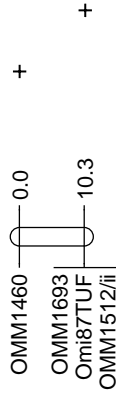

Male 2

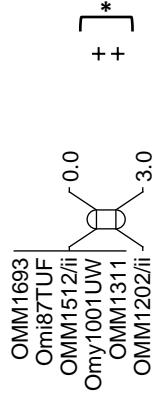

# RYHyb27

Female 1

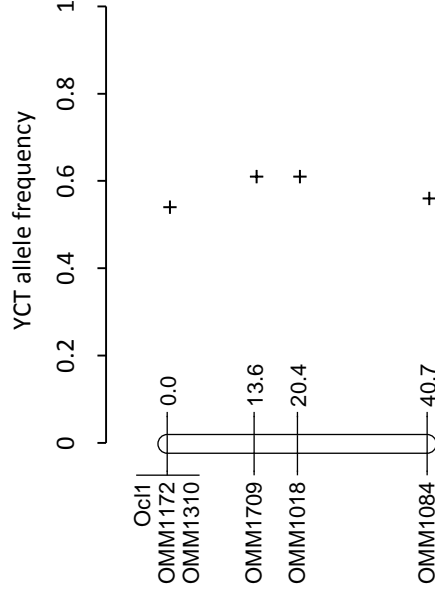

Female 2

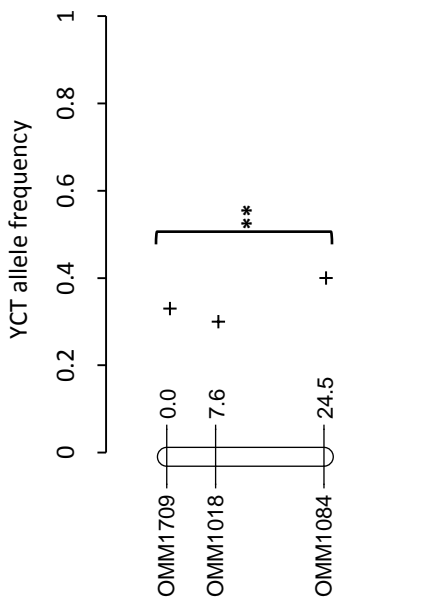

Male 1

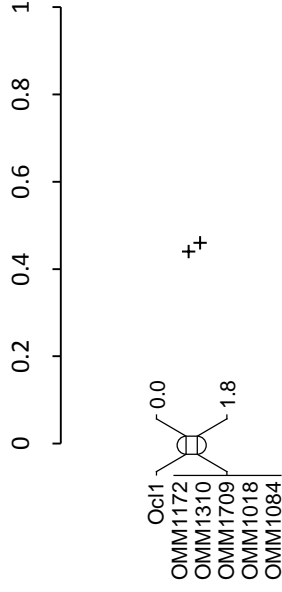

Male 2

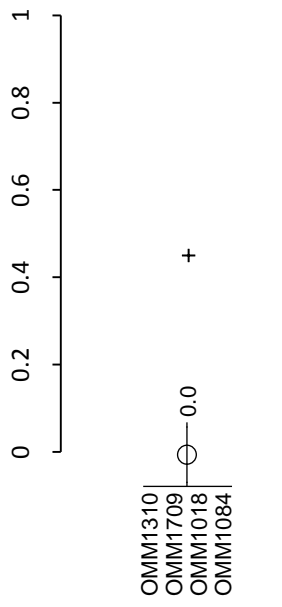

# RYHyb28

Female 1

YCT allele frequency

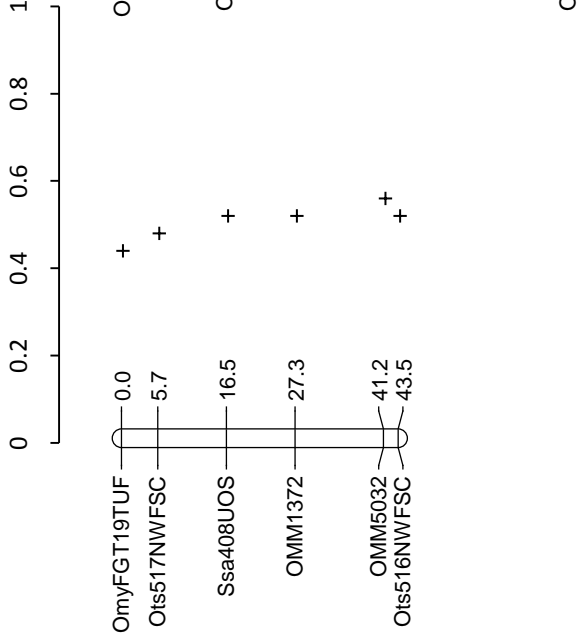

Female 2

YCT allele frequency

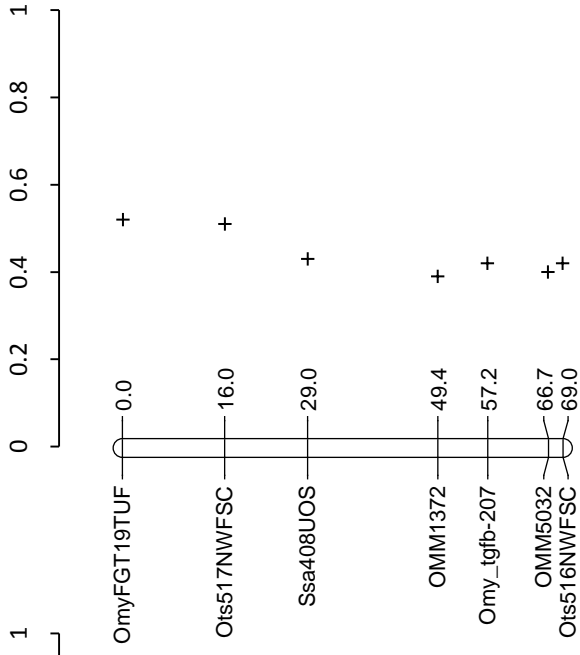

Male 1

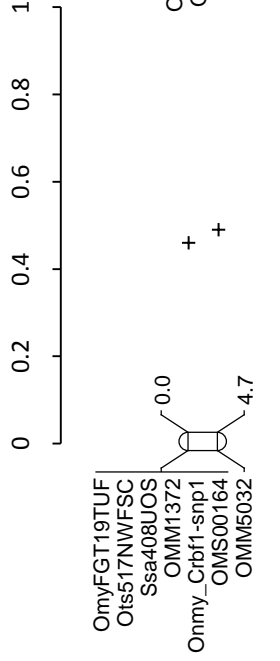

Male 2

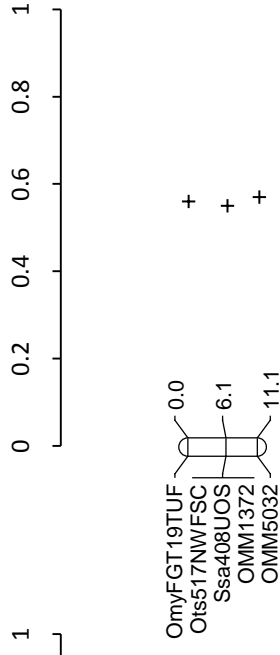

Supplement: 1471-2164-14-570-S2.pdf [file 1471-2164-14-570-S2.pdf]
