# Supplementary material for: Chromosome rearrangements, recombination suppression, and limited segregation distortion in hybrids between Yellowstone cutthroat trout (Oncorhynchus clarkii bouvieri) and rainbow trout (O. mykiss)
Source: PubMed Central journal article supplement (PMC3765842; doi:10.1186/1471-2164-14-570), 2013-08-22

Additional file 3. Female-, male-, and sex-merged  $F_1$  hybrid linkage maps in  $p$  to  $q$  orientation with rainbow trout chromosome designations (Omy) and linkage groups (RT) indicated in parentheses. Map distances (cM) represent the recombination fraction (theta) between loci.

# RHYyb01 (Omy1, RT6)

Female-merged

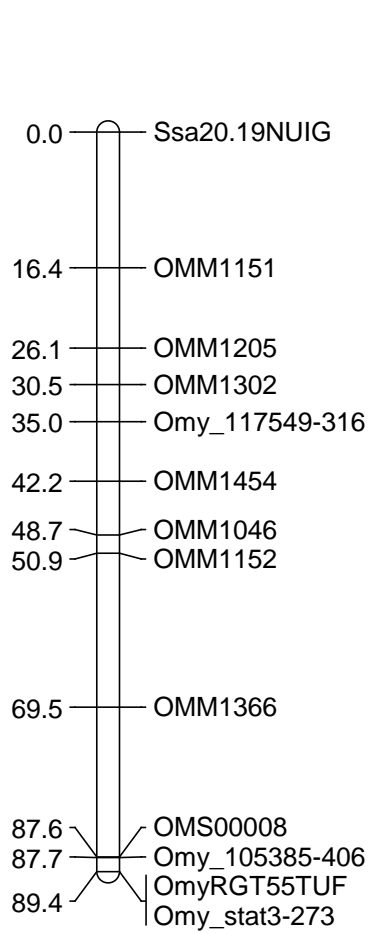

Male-merged

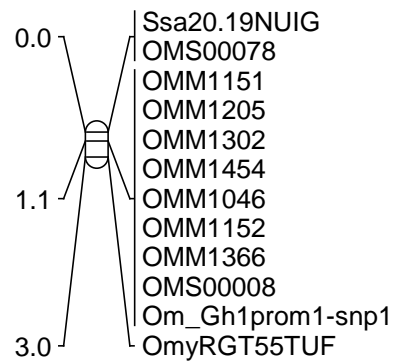

Sex-merged

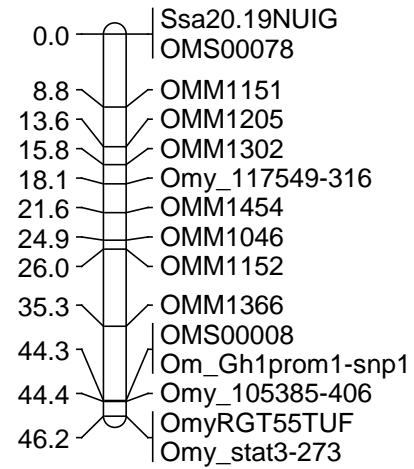

# RYHyb02 (Omy2, RT27)

Female-merged

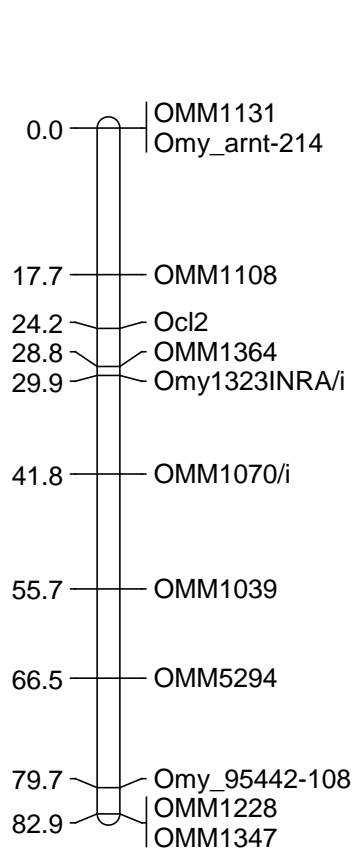

Male-merged

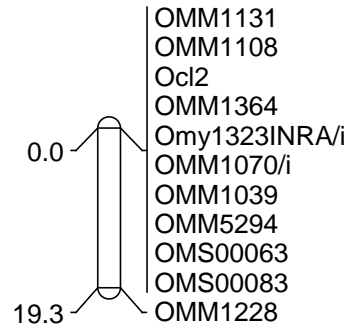

Sex-merged

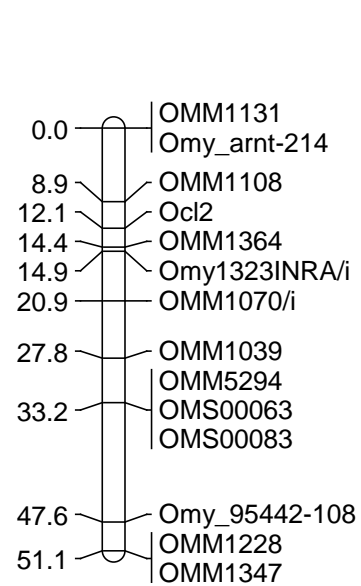

# RYHyb03 (Omy3, RT31)

Female-merged

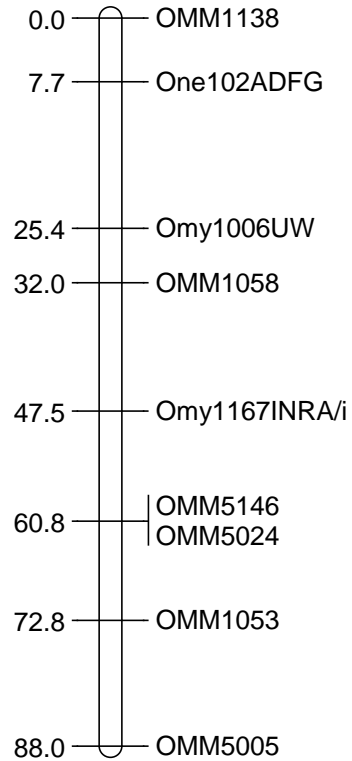

Male-merged

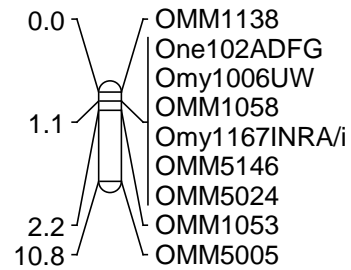

Sex-merged

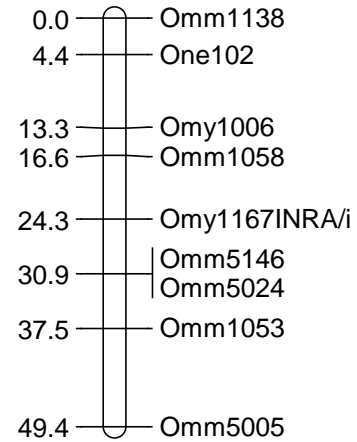

# RYHyb04 (Omy4, RT24)

Female-merged

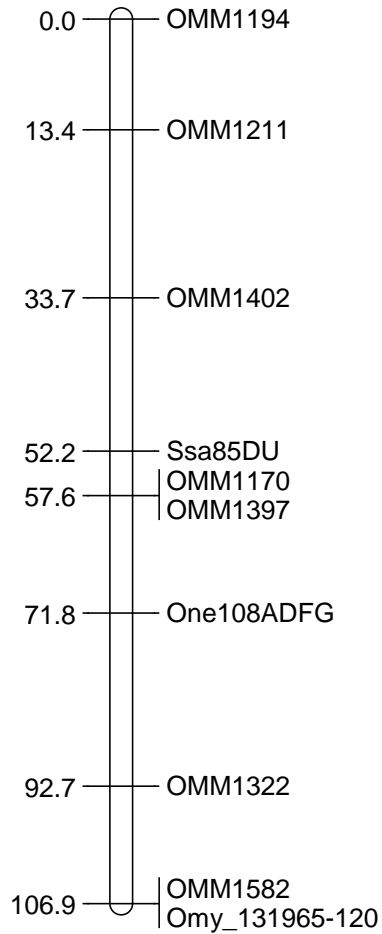

Male-merged

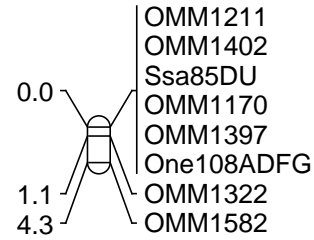

Sex-merged

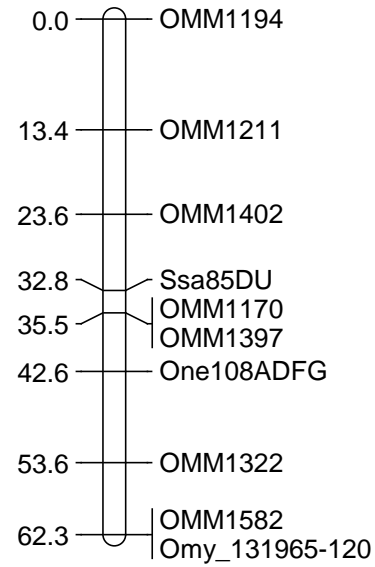

# RYHyb05 (Omy5, RT8)

Female-merged

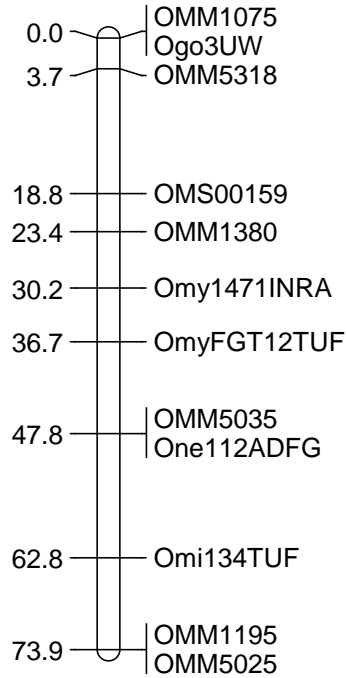

Male-merged

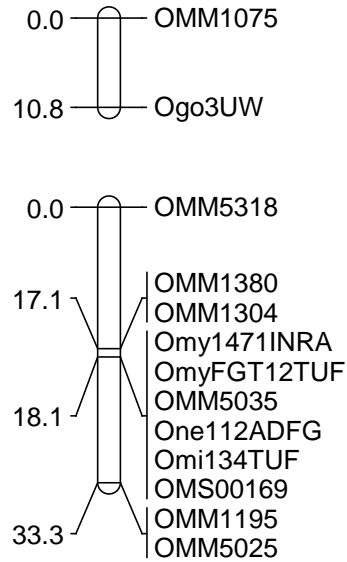

Sex-merged

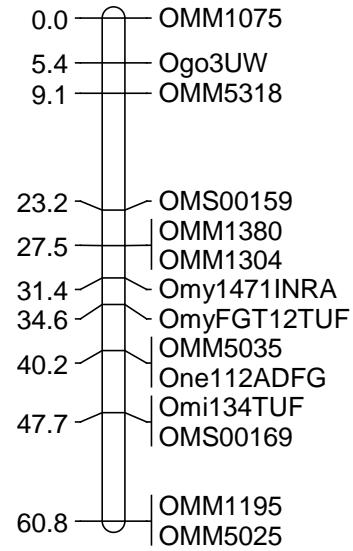

# RYHyb06 (Omy6, RT10)

Female-merged

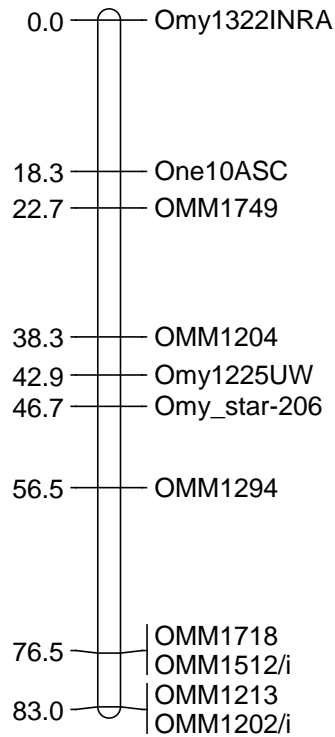

Male-merged

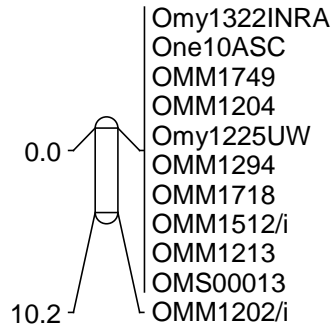

Sex-merged

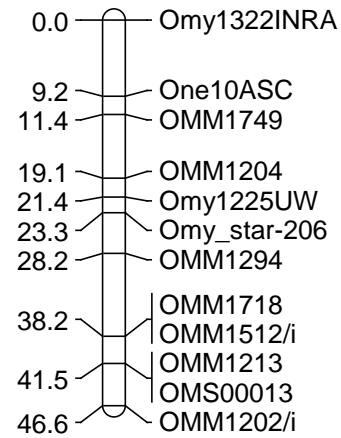

# RYHyb07 (Omy7, RT12)

Female-merged

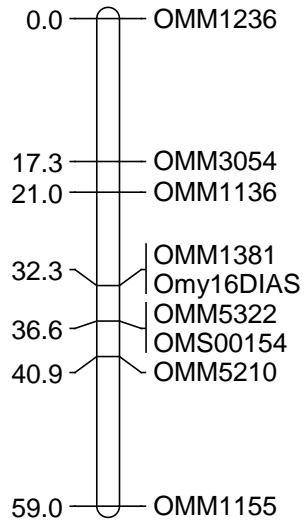

Male-merged

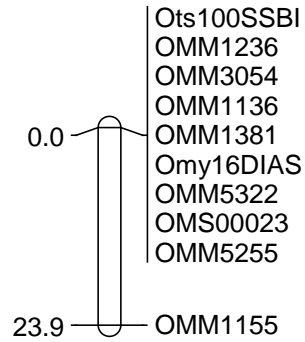

Sex-merged

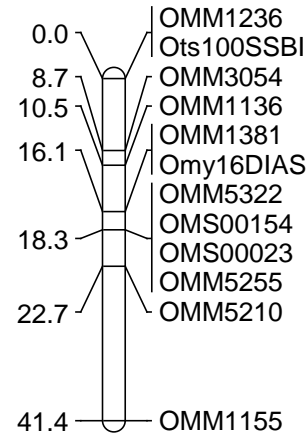



# RYHyb08 (Omy8, RT23)

Female-merged

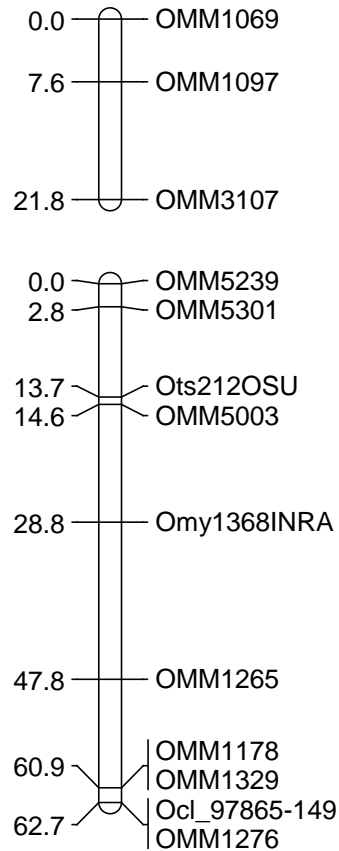

Male-merged

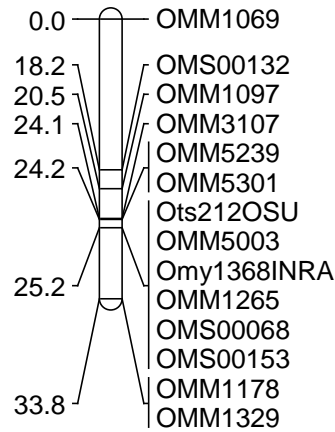

Sex-merged

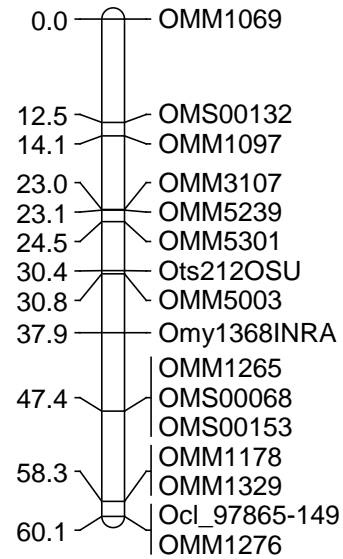

# RYHyb09 (Omy9, RT21)

## Female-merged

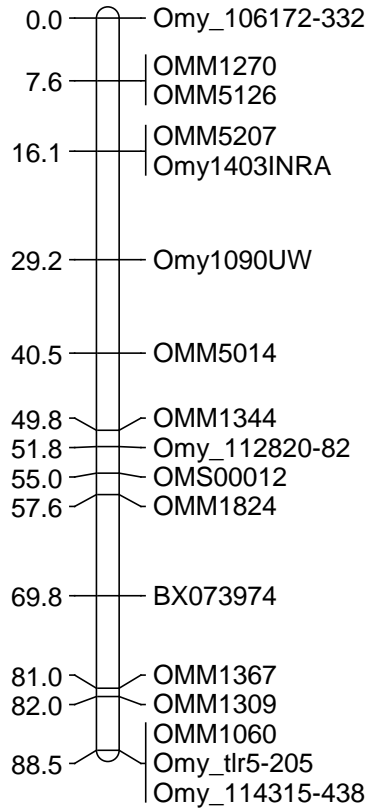

## Male-merged

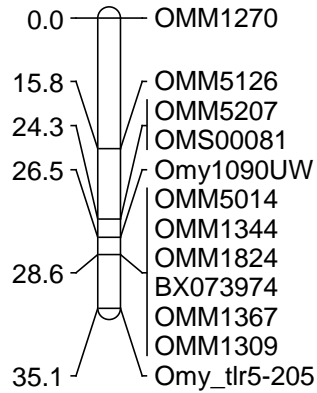

## Sex-merged

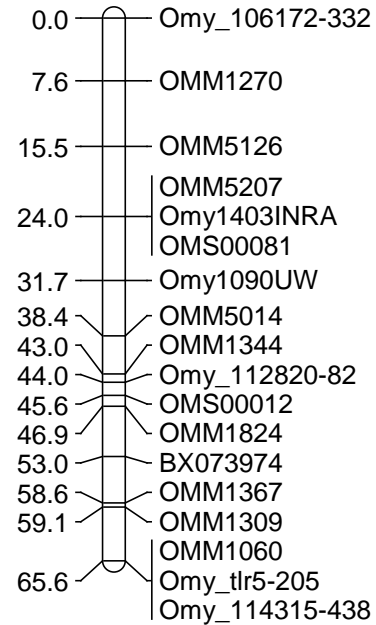

# RYHyb10 (Omy10, RT20)

Female-merged

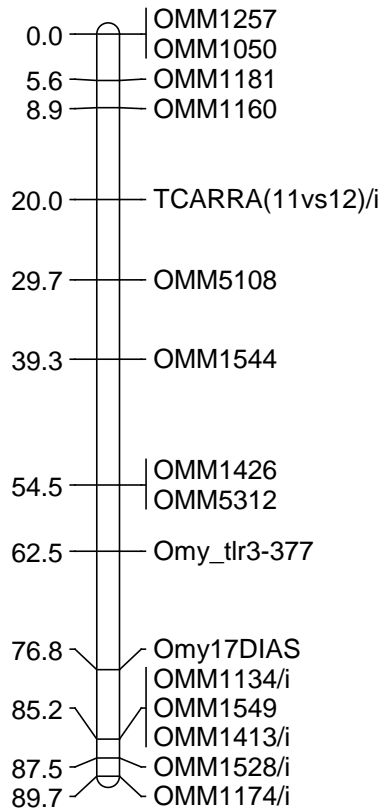

Male-merged

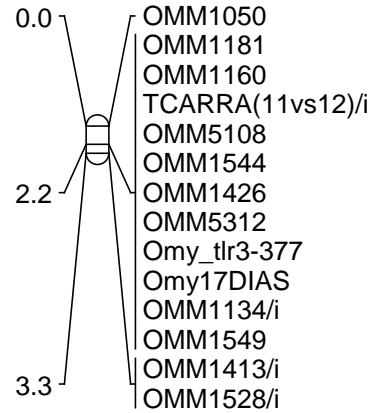

Sex-merged

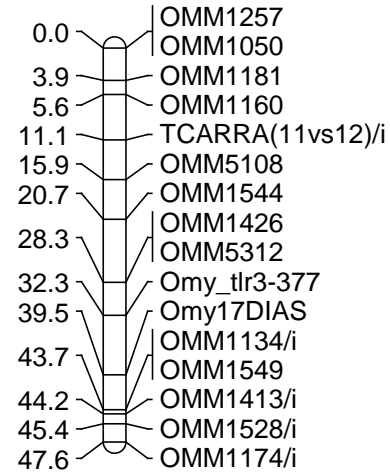

# RYHyb11 (Omy11, RT19)

Female-merged

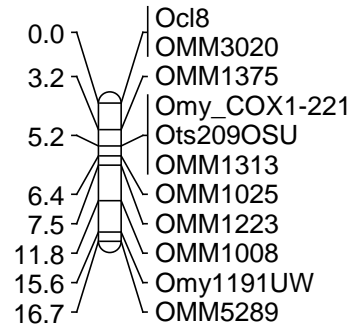

Male-merged

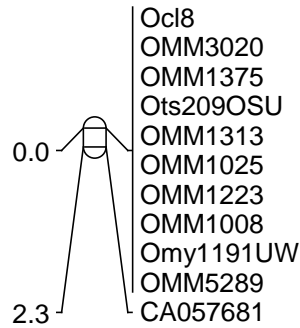

Sex-merged

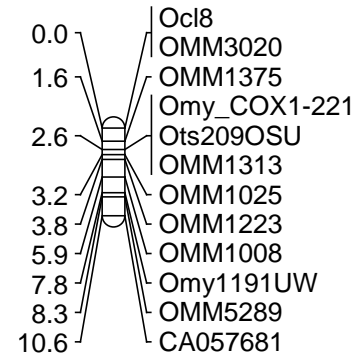

# RYHyb12 (Omy12, RT9)

Female-merged

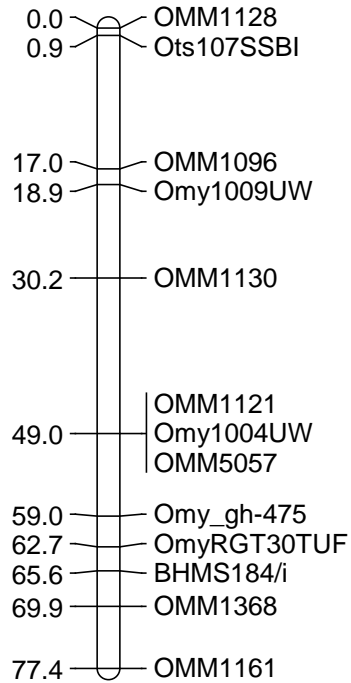

Male-merged

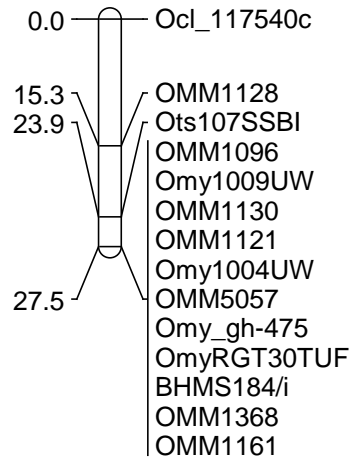

Sex-merged

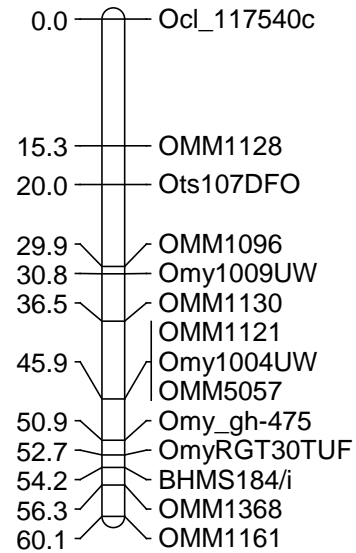

# RYHyb13 (Omy13, RT2)

## Female-merged

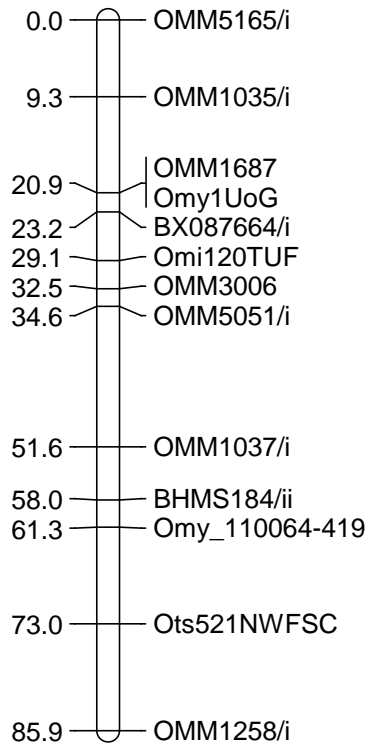

## Male-merged

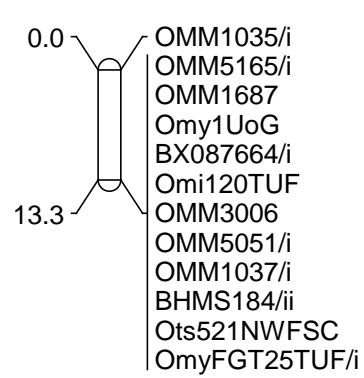

## Sex-merged

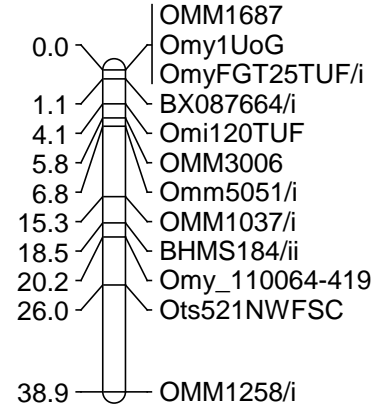

# RYHyb14 (Omy14, RT3)

Female-merged

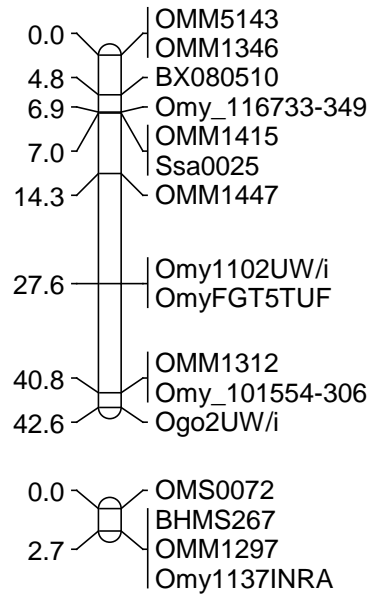

Male-merged

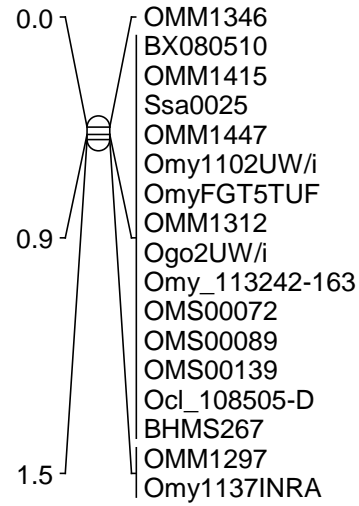

Sex-merged

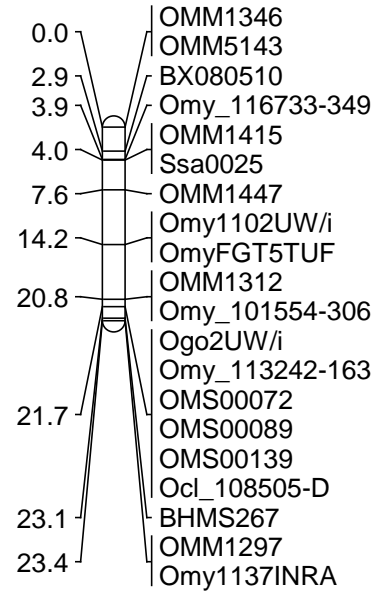

# RYHyb15 (Omy15, RT7)

Female-merged

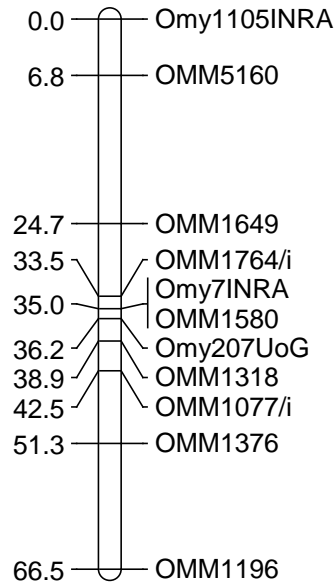

Male-merged

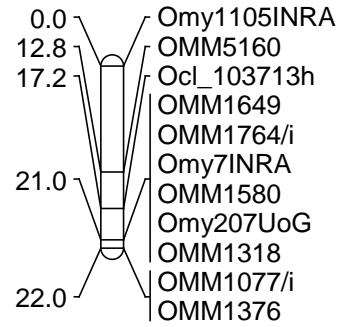

Sex-merged

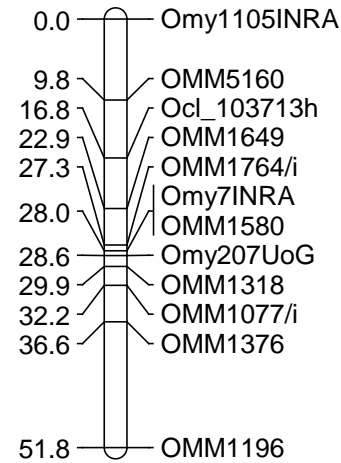



# RYHyb16 (Omy16, RT22)

Female-merged

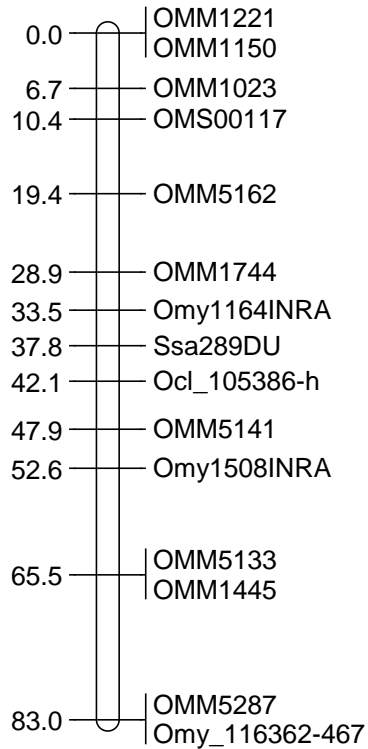

Male-merged

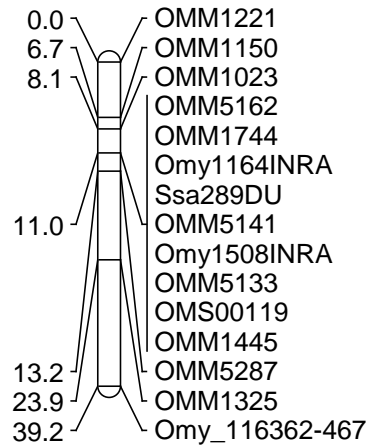

Sex-merged

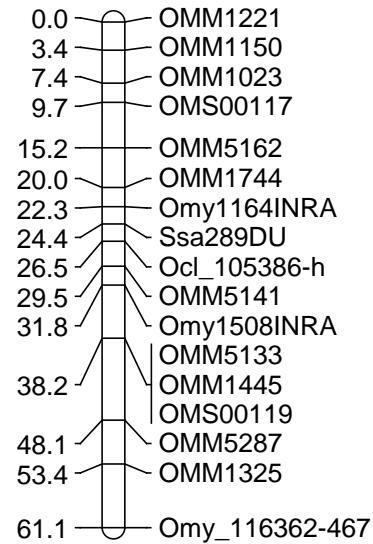

# RYHyb17 (Omy17, RT29)

Female-merged

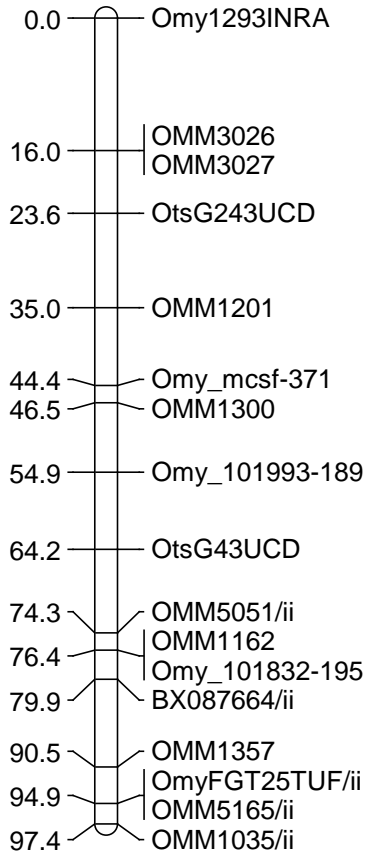

Male-merged

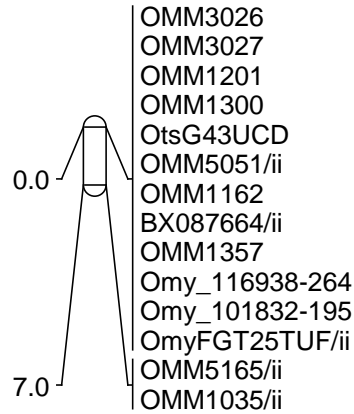

Sex-merged

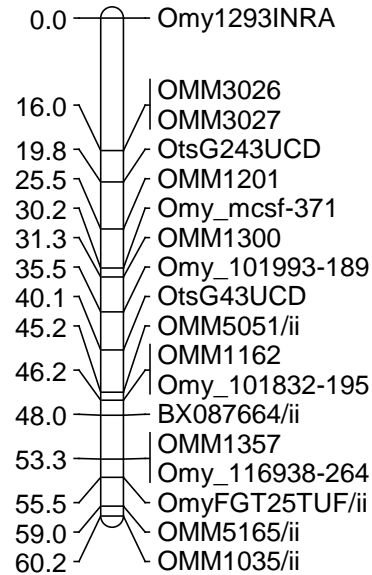

# RYHyb18 (Omy18, RT16)

Female-merged

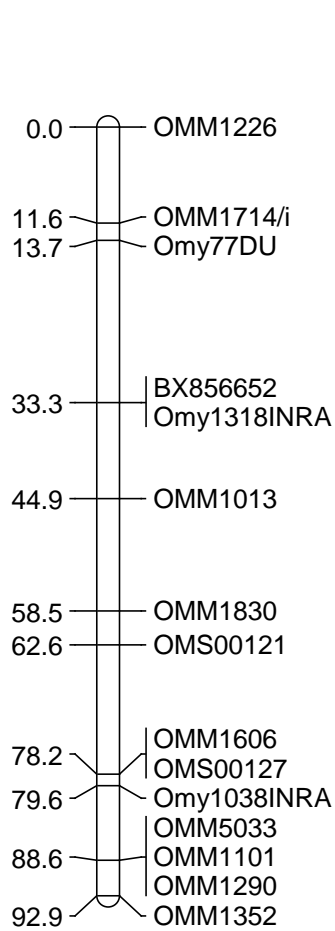

Male-merged

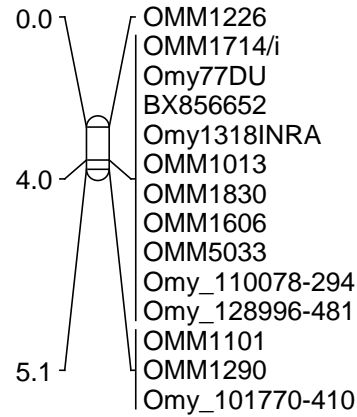

Sex-merged

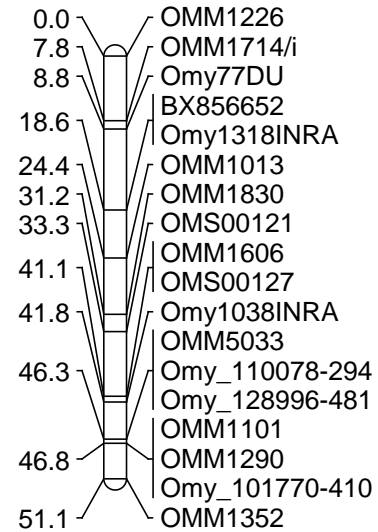

# RYHyb19 (Omy19, RT14)

## Female-merged

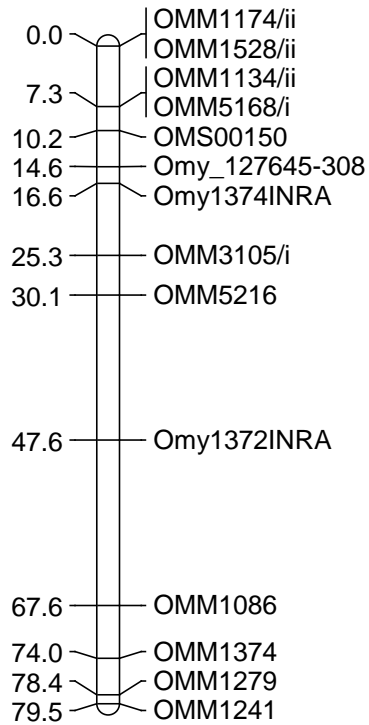

## Male-merged

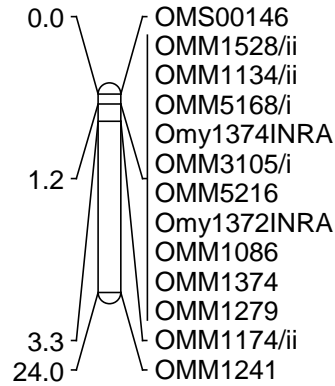

## Sex-merged

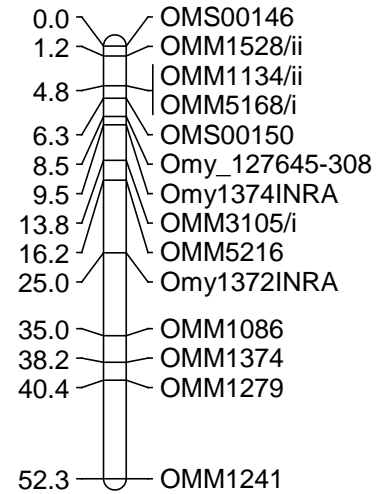

# RYHyb20 (Omy28\_Omy20, RT13\_RT17)

Female-merged

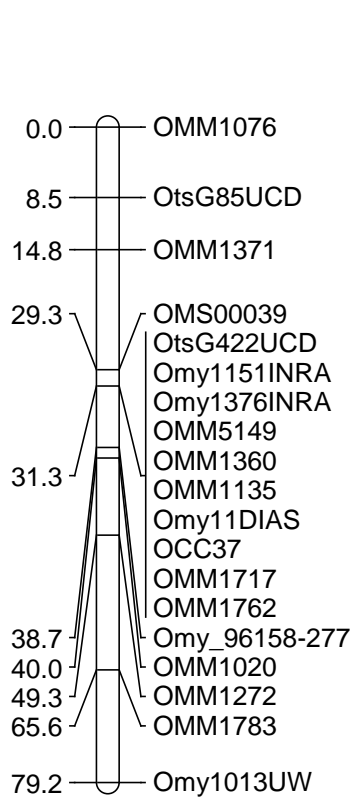

Male-merged

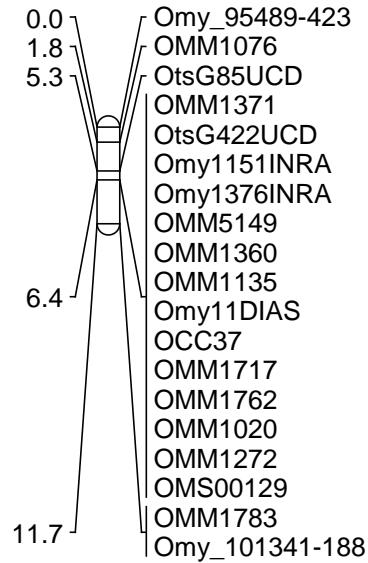

Sex-merged

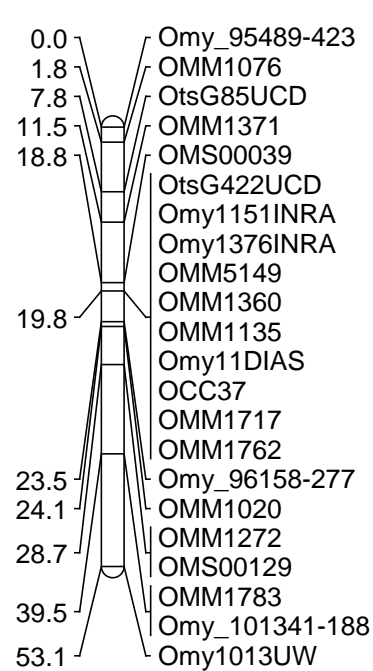

# RYHyb21 (Omy21, RT15)

Female-merged

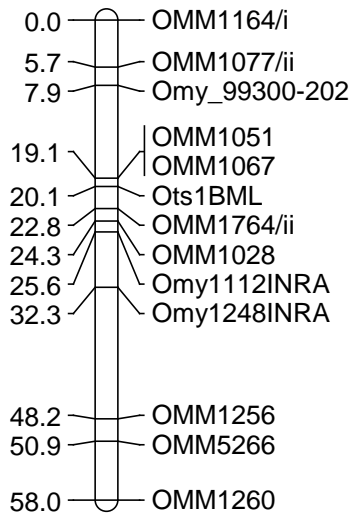

Male-merged

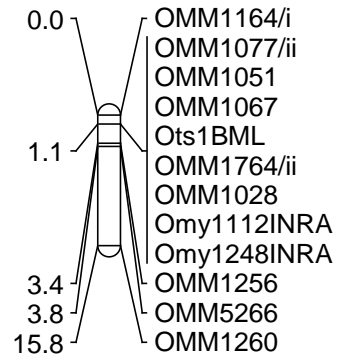

Sex-merged

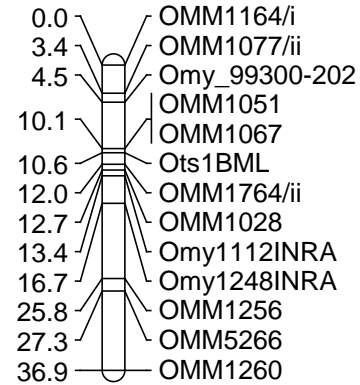

# RYHyb22 (Omy22, RT5)

## Female-merged

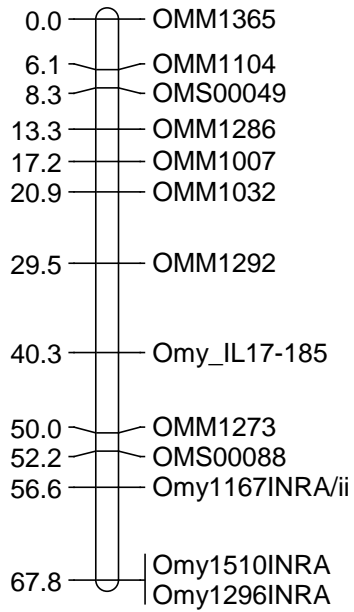

## Male-merged

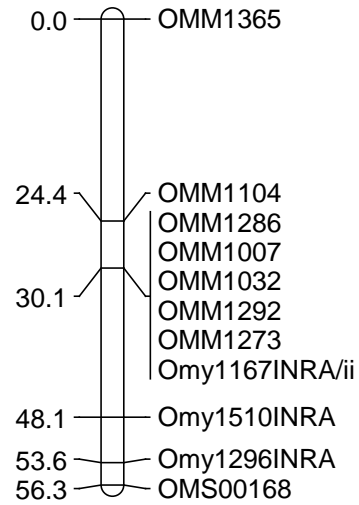

## Sex-merged

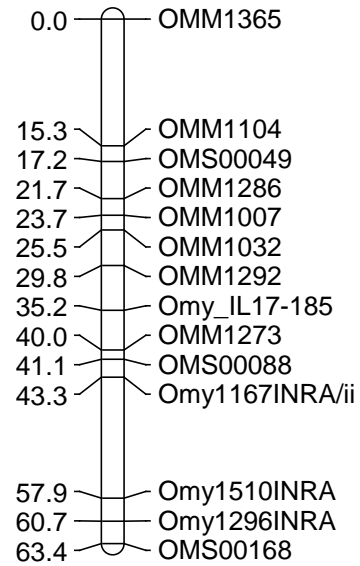

# RYHyb23 (Omy23, RT30)

Female-merged

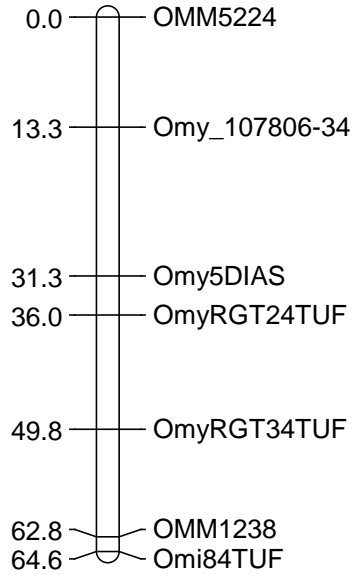

Male-merged

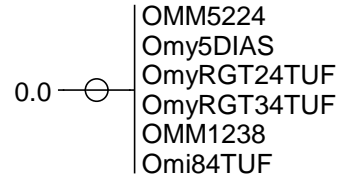

Sex-merged

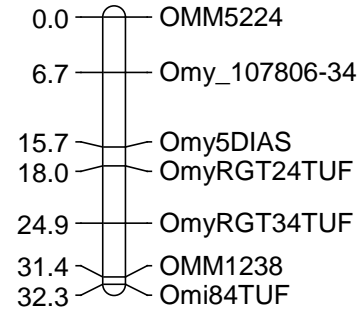



# RYHyb24 (Omy24, RT26)

Female-merged

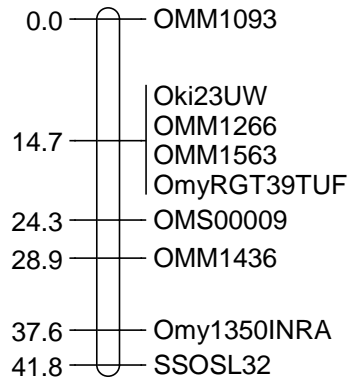

Male-merged

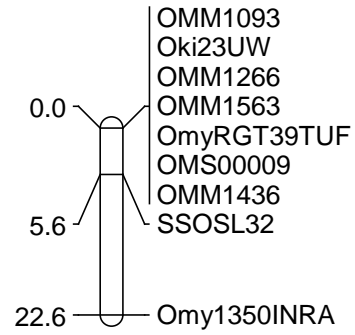

Sex-merged

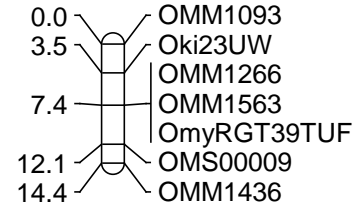

# RYHyb25 (Omy25, RT4) and RYHyb29 (Omy29, RT25) polymorphism

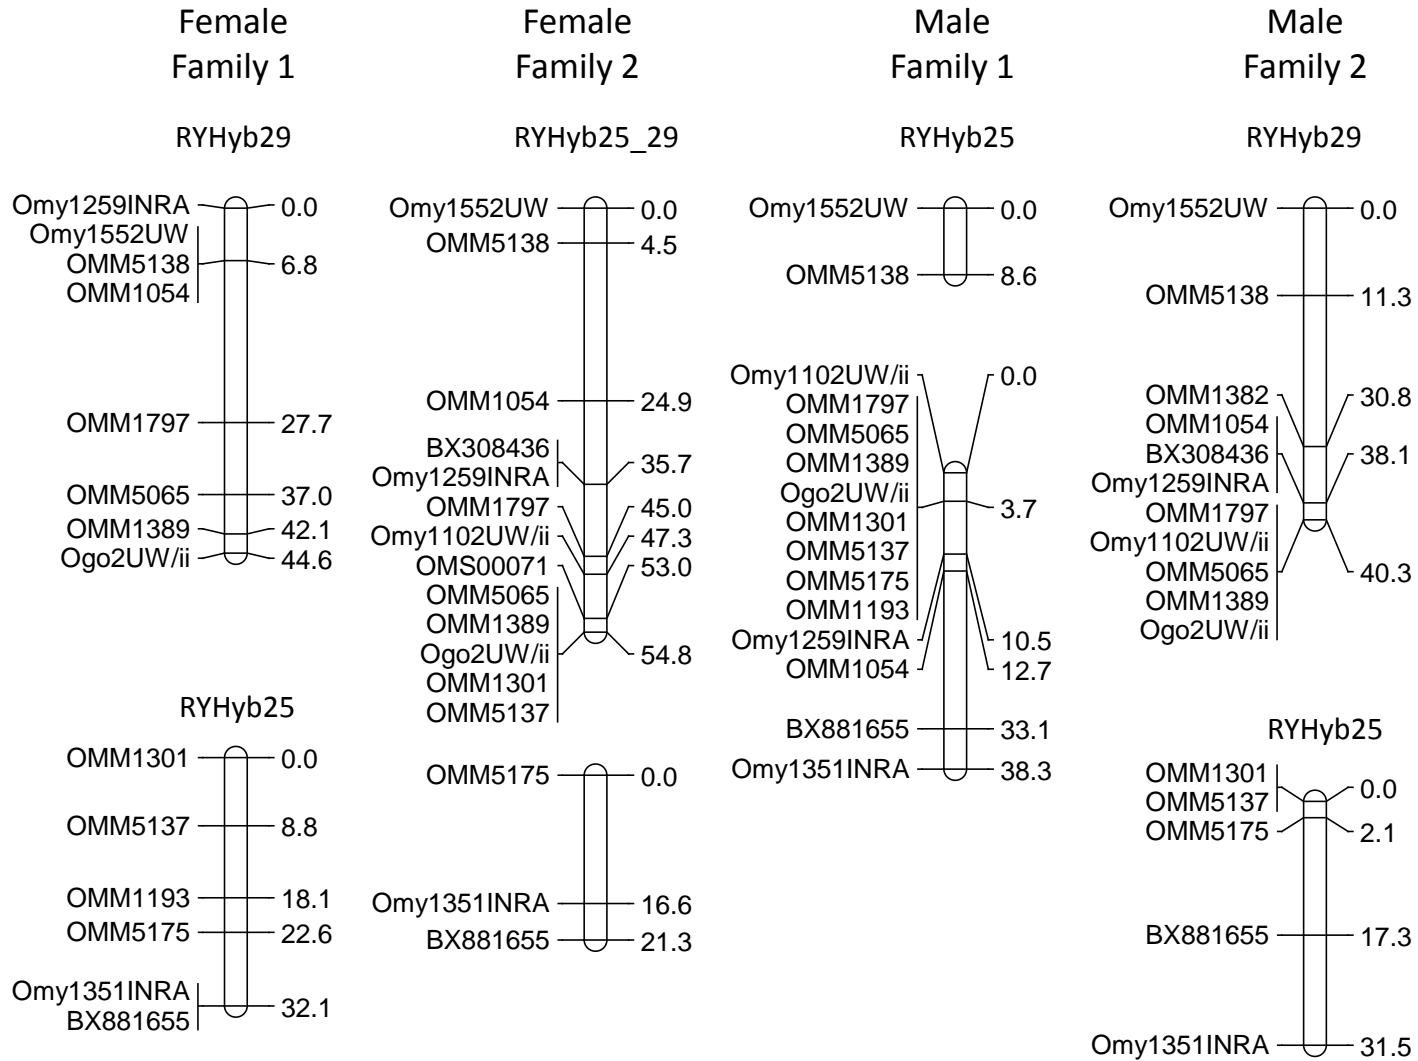

# RYHyb26 (Omy26, RT18)

Female-merged

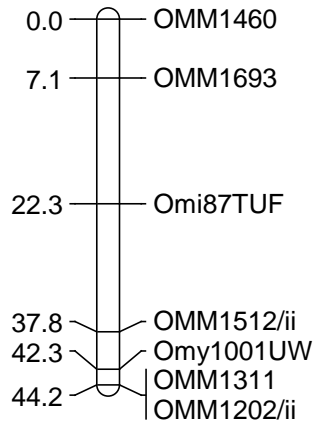

Male-merged

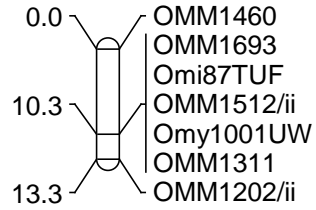

Sex-merged

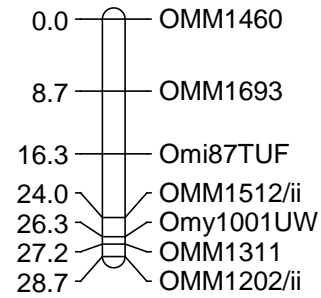

# RYHyb27 (Omy27, RT11)

Female-merged

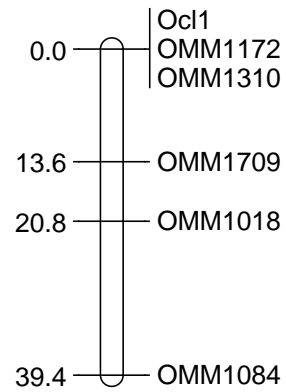

Male-merged

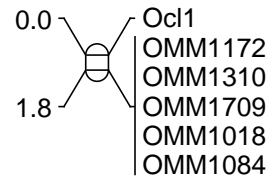

Sex-merged

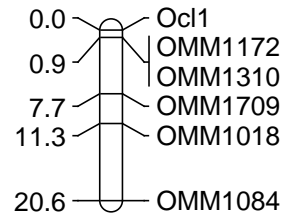

# RYHyb29 (OmySex, RT1)

Female-merged

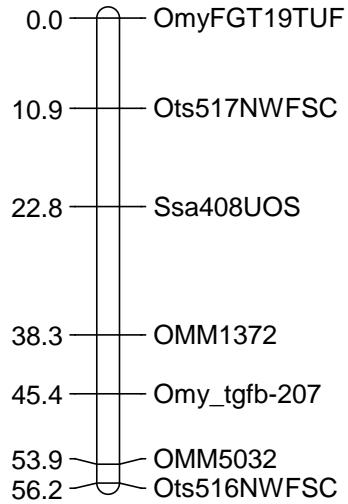

Male-merged

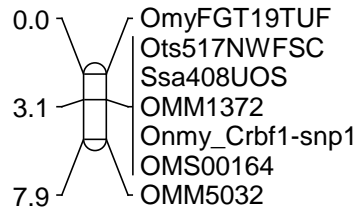

Sex-merged

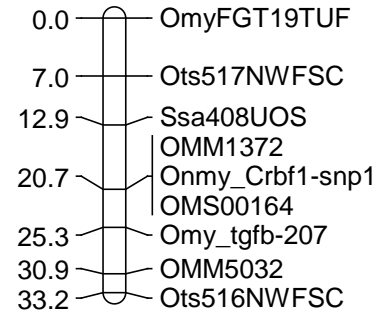

Supplement: 1471-2164-14-570-S3.pdf [file 1471-2164-14-570-S3.pdf]
