# Supplementary material for: Chromosome rearrangements, recombination suppression, and limited segregation distortion in hybrids between Yellowstone cutthroat trout (Oncorhynchus clarkii bouvieri) and rainbow trout (O. mykiss)
Source: PubMed Central journal article supplement (PMC3765842; doi:10.1186/1471-2164-14-570), 2013-08-22
Supplement: 1471-2164-14-570-S5.pdf [file 1471-2164-14-570-S5.pdf]

Additional file 5. Genotypic frequency distributions (Yellowstone cutthroat trout homozygotes, YCT/YCT; rainbow trout homozygotes, RBT/RBT; and heterozygotes, YCT/RBT) for loci in Family 1, Family 2, and loci scored in both families combined. Loci are presented in map order ( $p$  to  $q$  orientation), except those within stippled boxes which represent species markers and variable SNP markers for which mapping parents were heterozygous for the same alleles. These loci were assigned to linkage groups but not localized within linkage groups. \* indicates Chi-square test where  $P < 0.05$  with two degrees of freedom, and\*\* indicates genotypic frequency distributions that differ significantly from expected distributions after applying a false discovery rate correction (B-Y FDR) for multiple tests.

### RYHyb01 (Omy1, RT6)

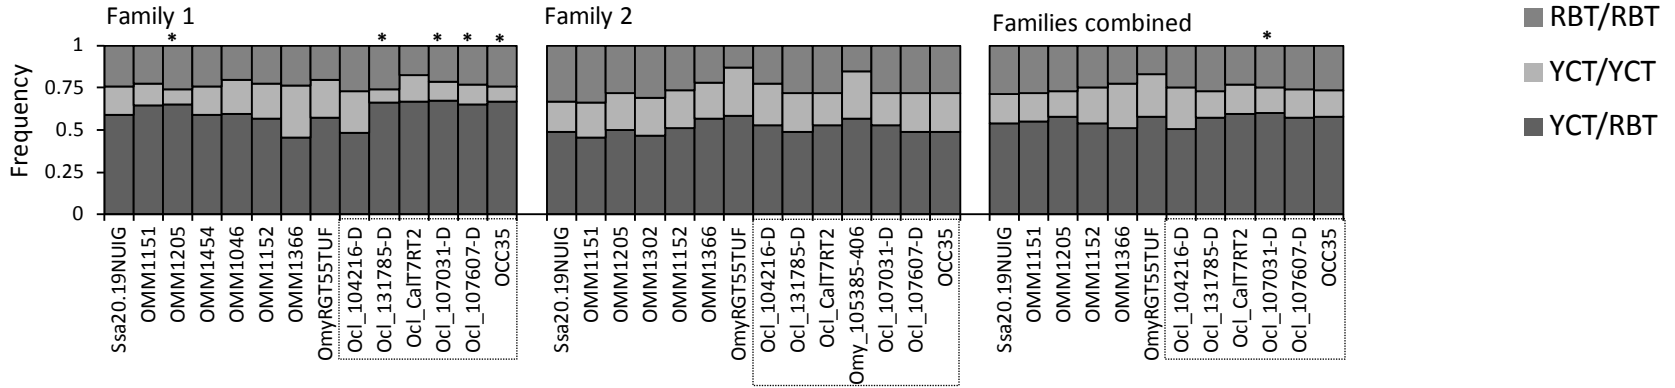

### RYHyb02 (Omy2, RT27)

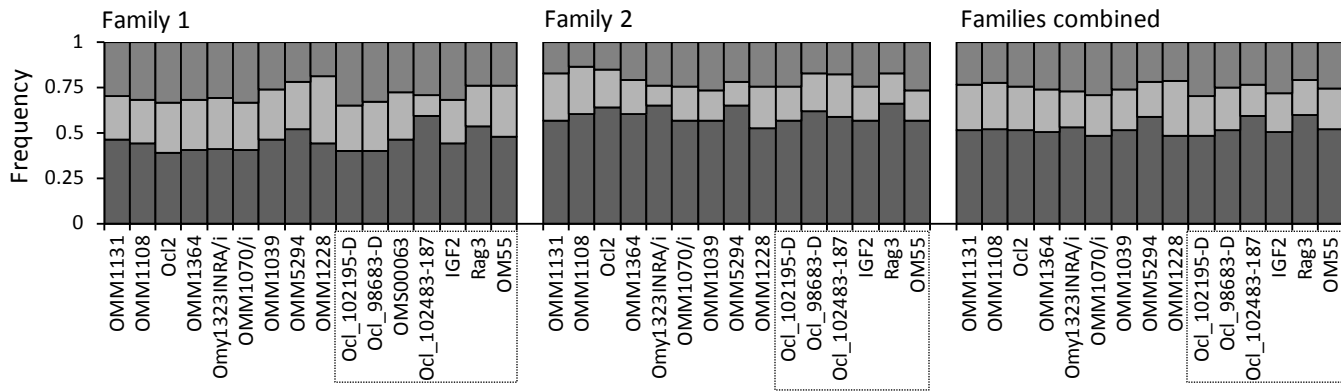

### RYHyb03 (Omy3, RT31)

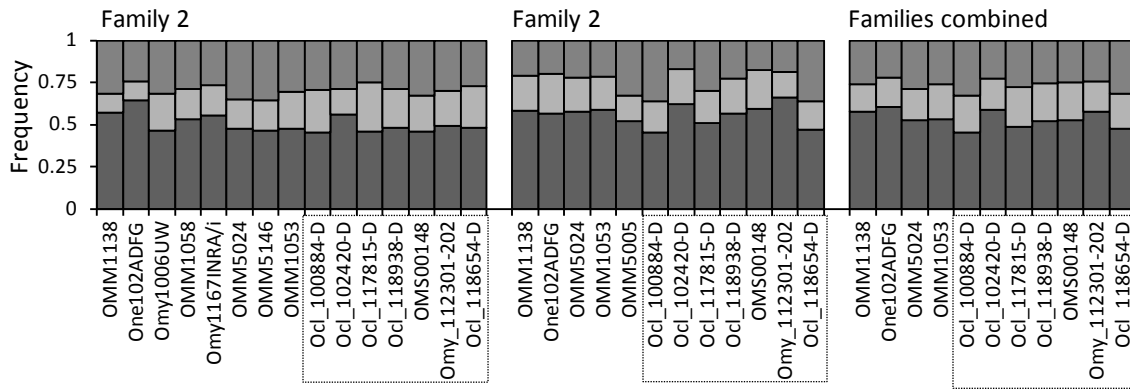

### RYHyb04 (Omy4, RT24)

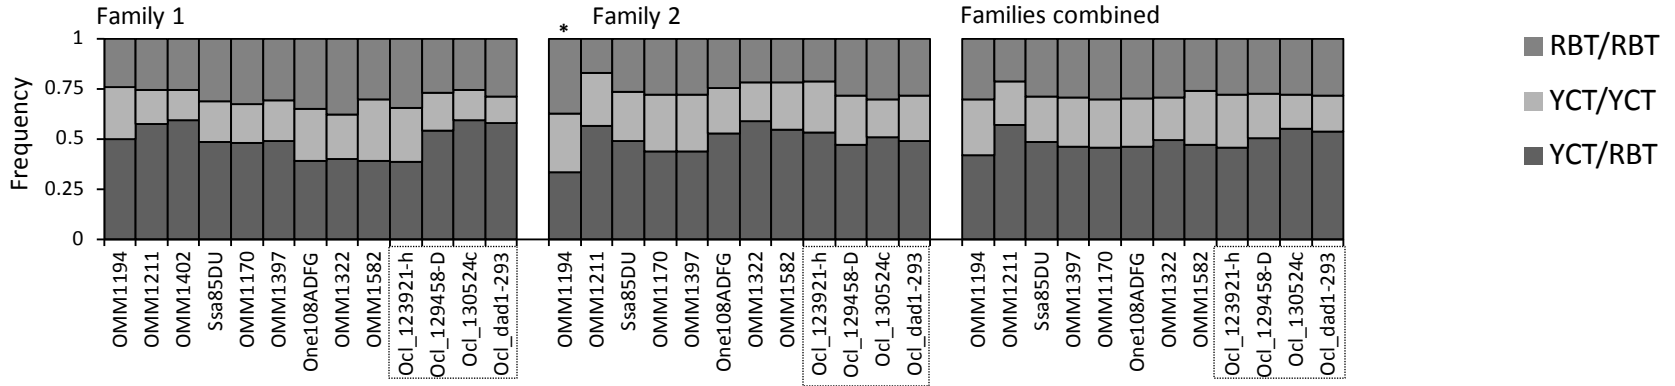

### RYHyb05 (Omy5, RT8)

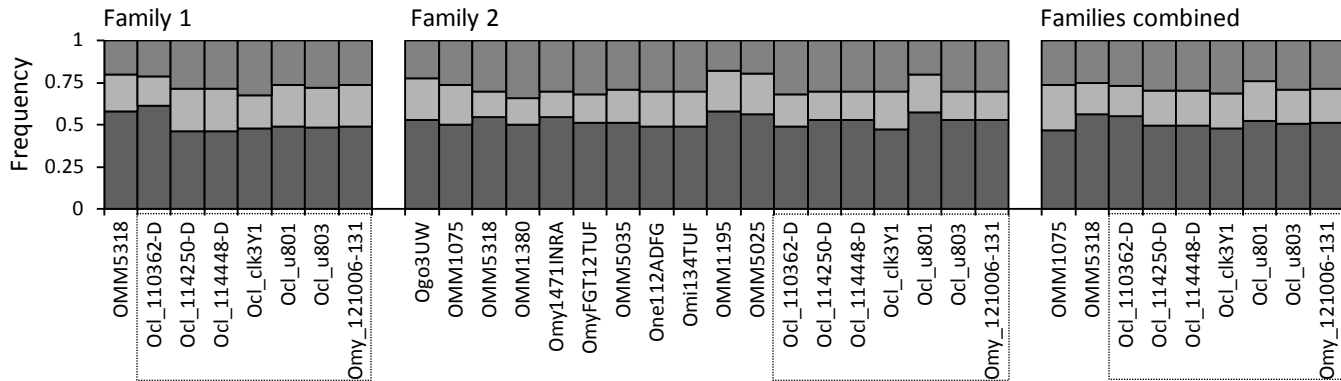

### RYHyb06 (Omy6, RT10)

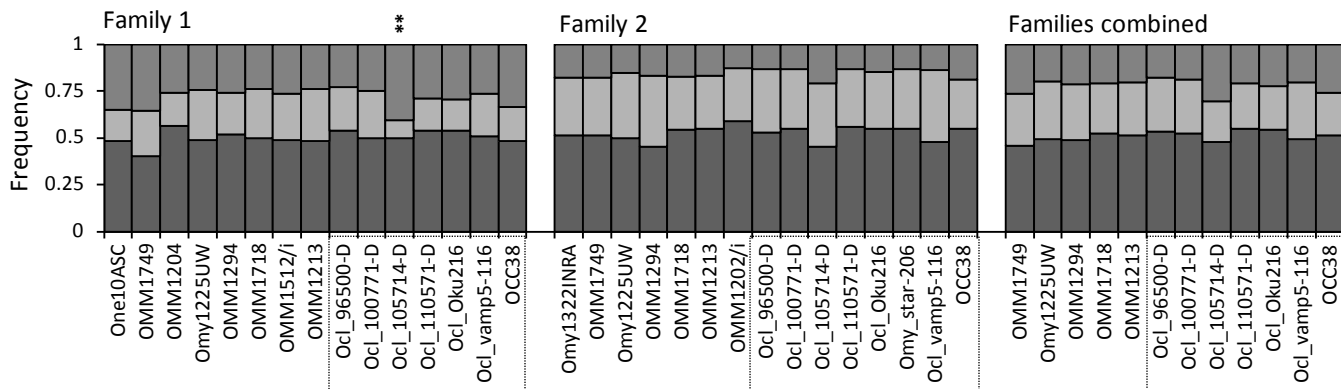

### RYHyb07 (Omy7, RT12)

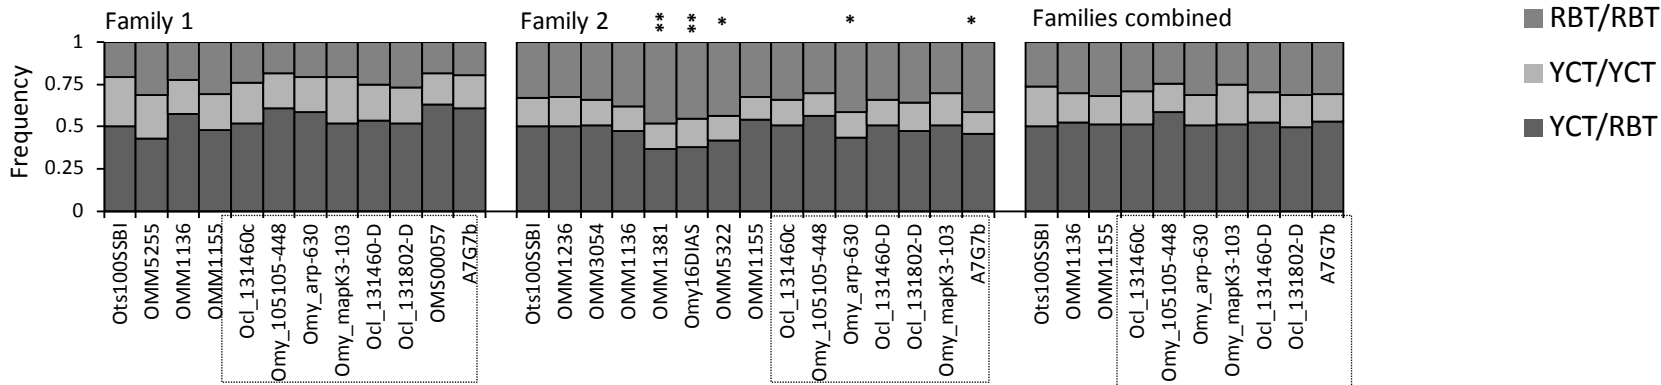

### RYHyb08 (Omy8, RT23)

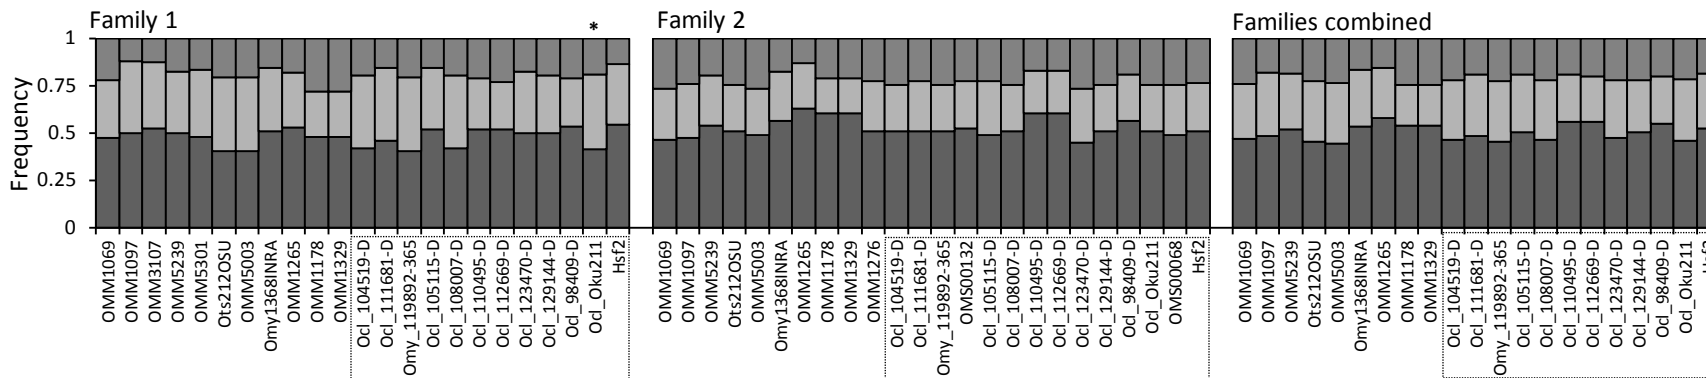

### RYHyb09 (Omy9, RT21)

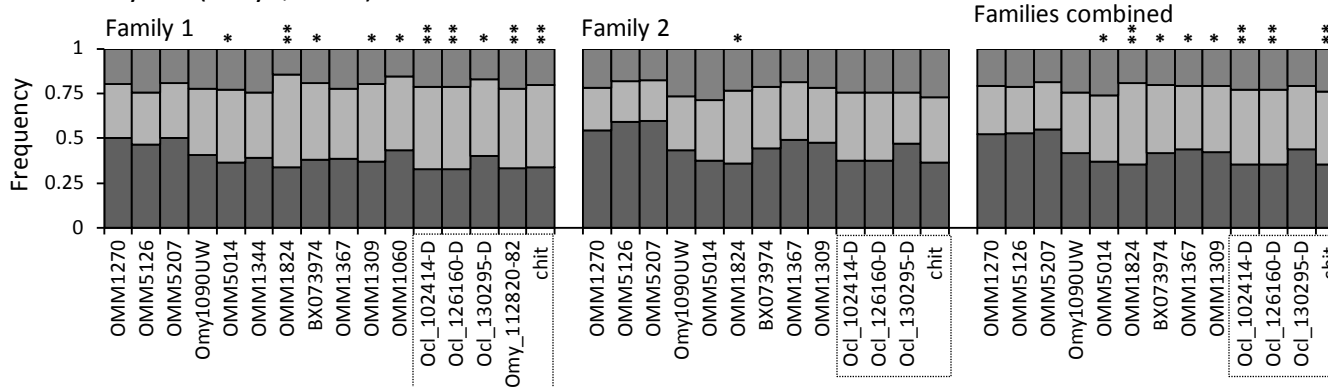

### RYHyb10 (Omy10, RT20)

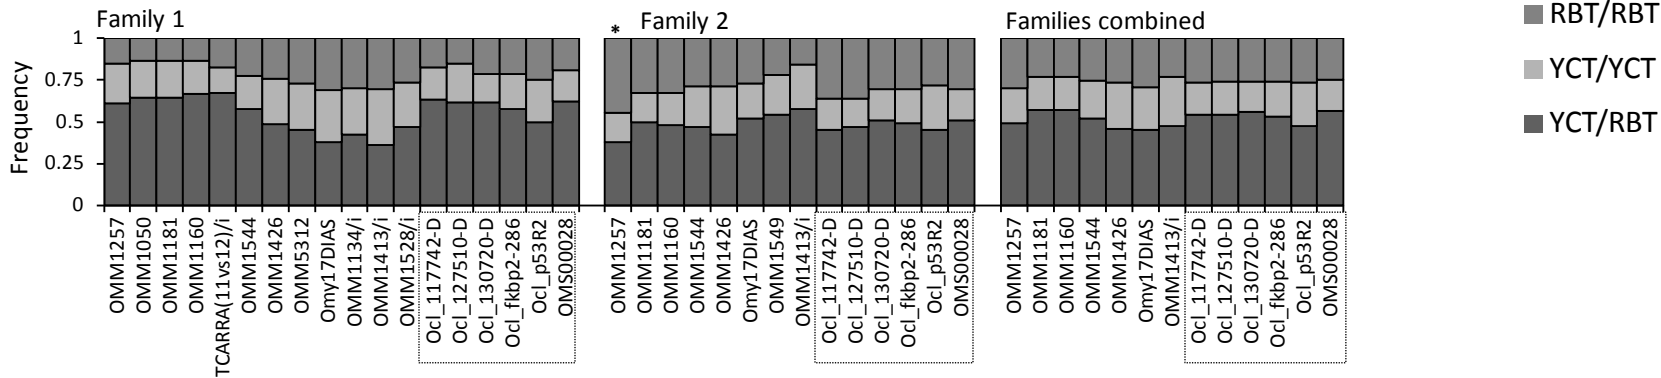

### RYHyb11 (Omy11, RT19)

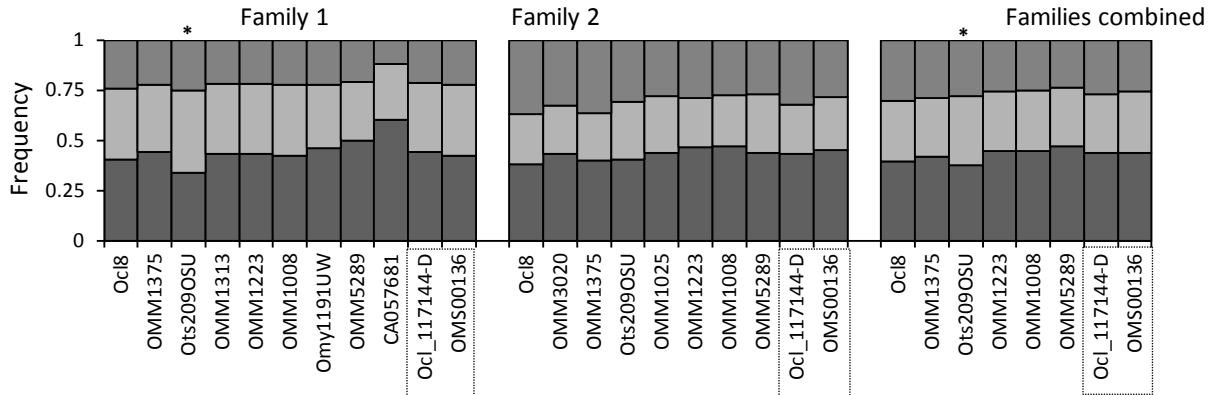

### RYHyb12 (Omy12, RT9)

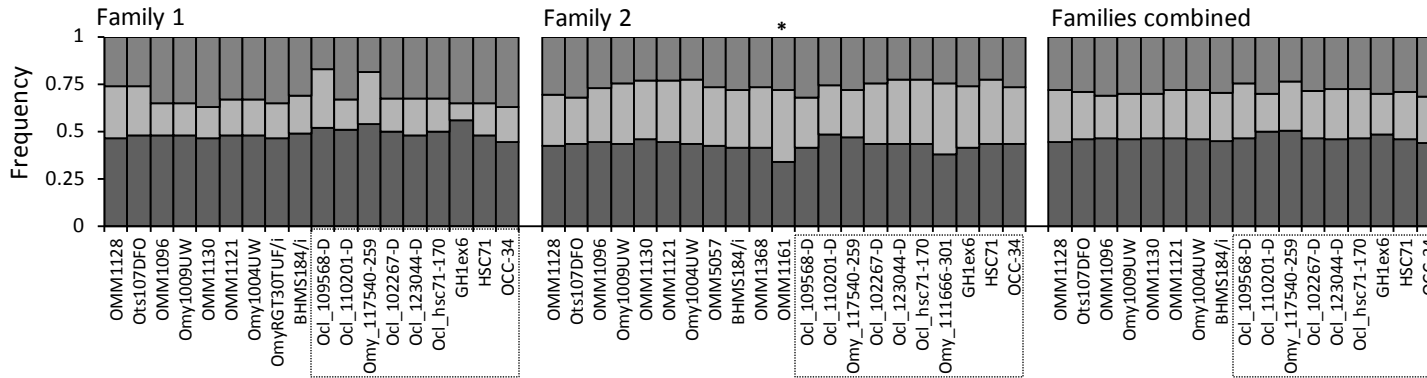

### RYHyb13 (Omy13, RT2)

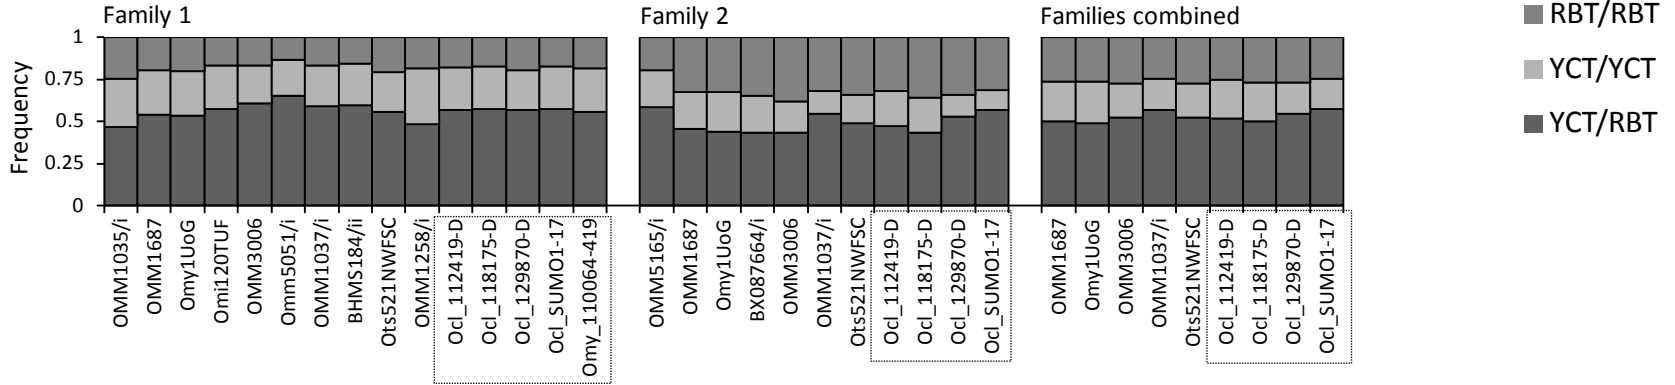

### RYHyb14 (Omy14, RT3)

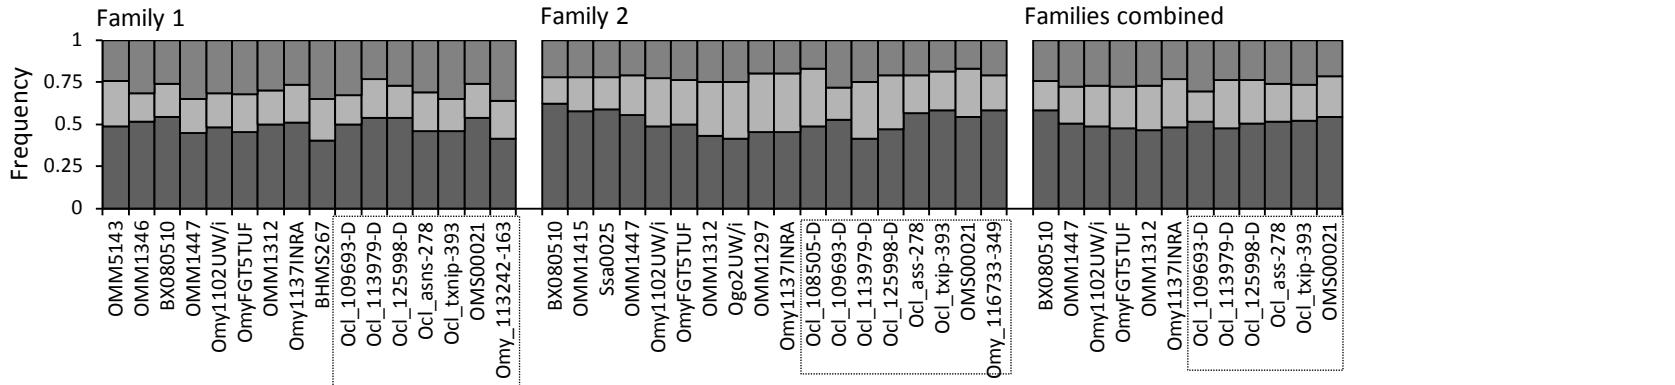

### RYHyb15 (Omy15, RT7)

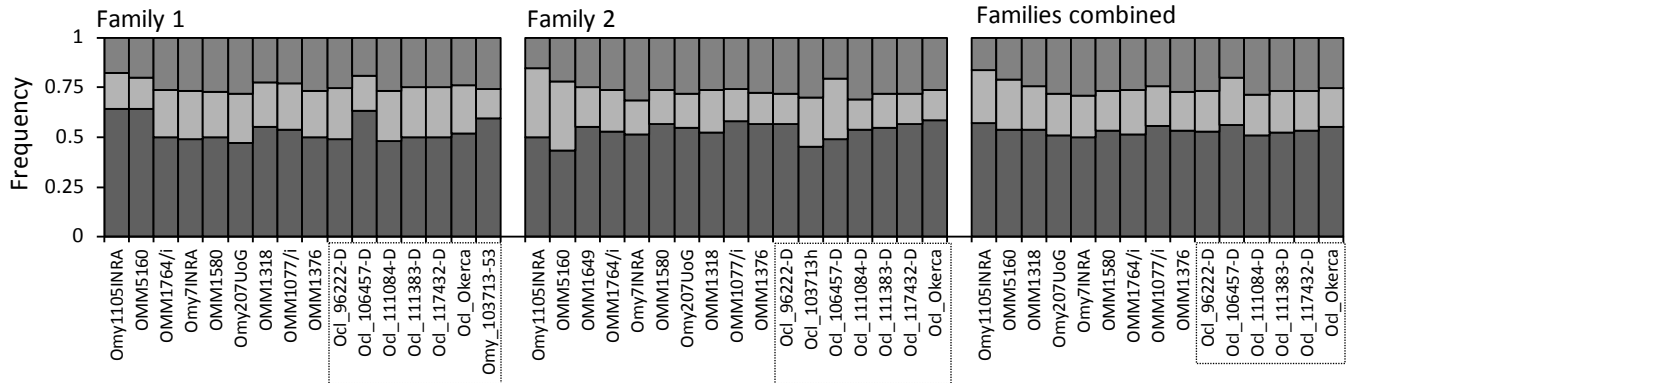

### RYHyb16 (Omy16, RT22)

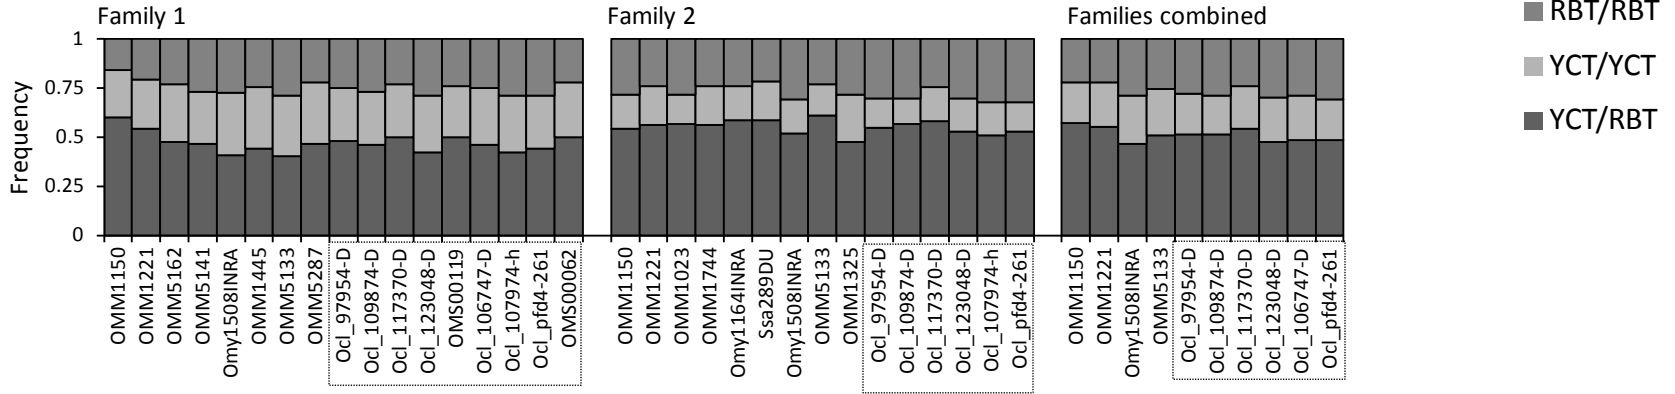

### RYHyb17 (Omy17, RT29)

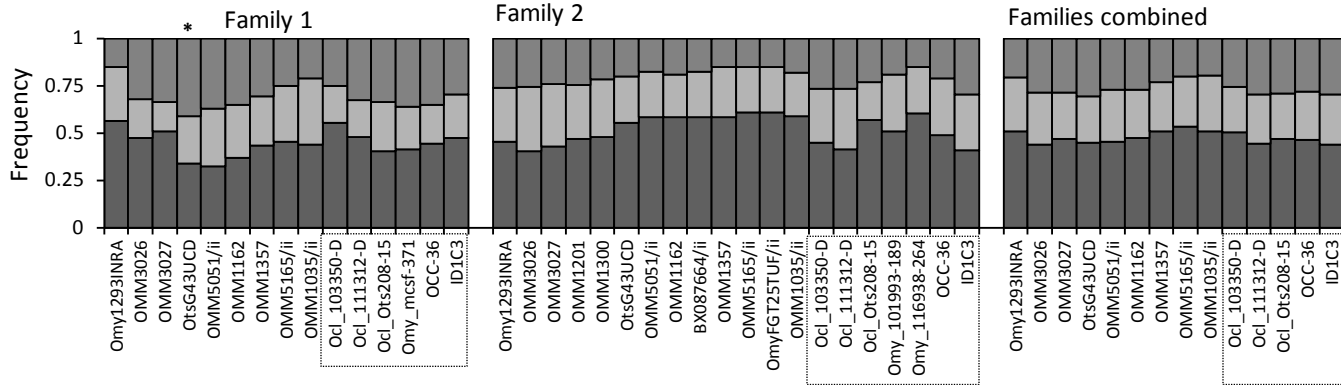

### RYHyb18 (Omy18, RT16)

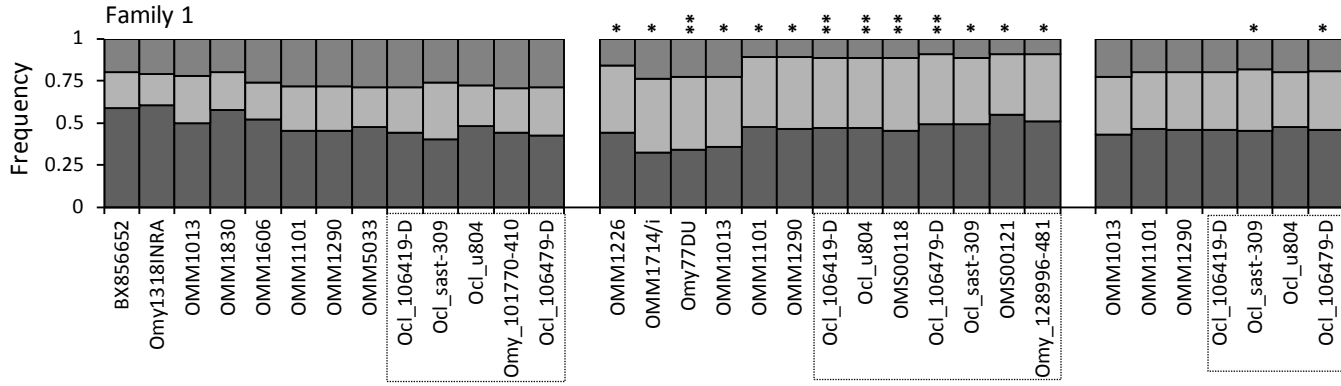

### RYHyb19 (Omy19, RT14)

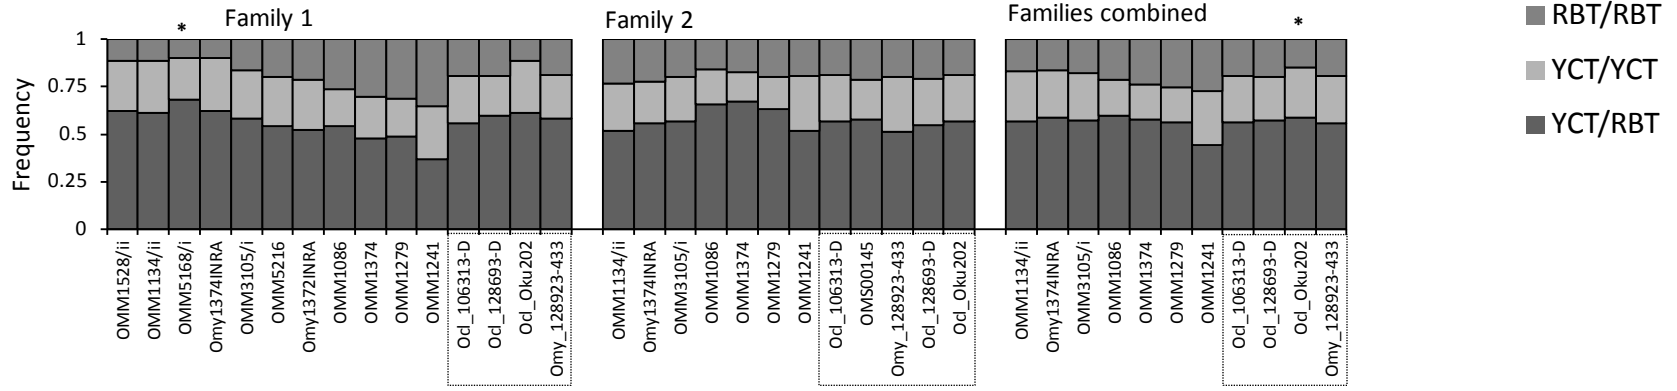

### RYHyb20 (Omy20\_Omy28, RT13\_RT17)

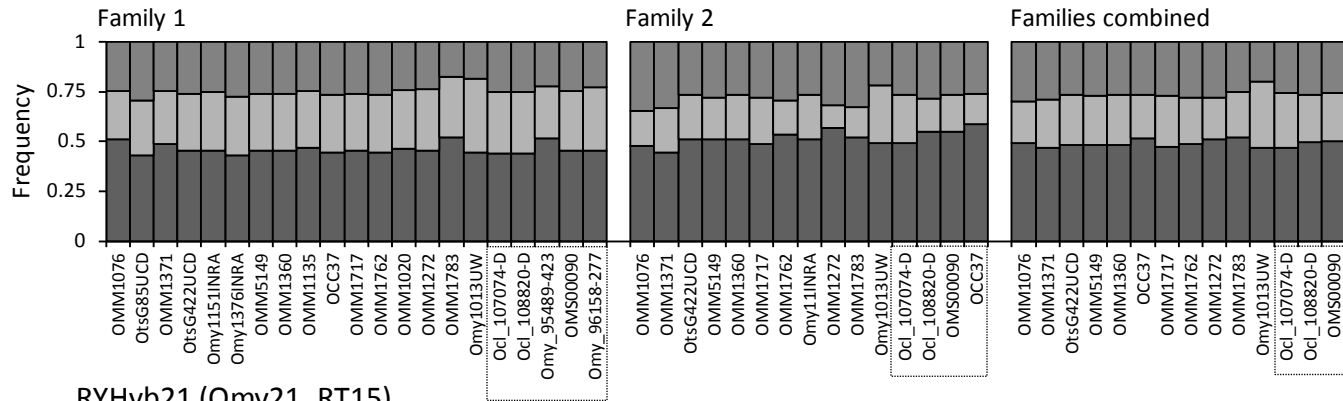

### RYHyb21 (Omy21, RT15)

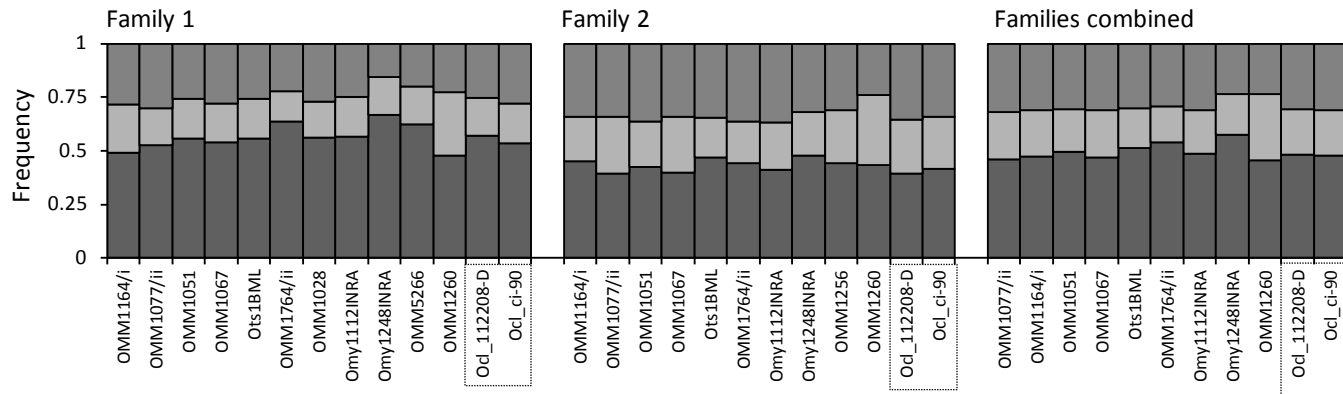



### RYHyb22 (Omy22, RT5)

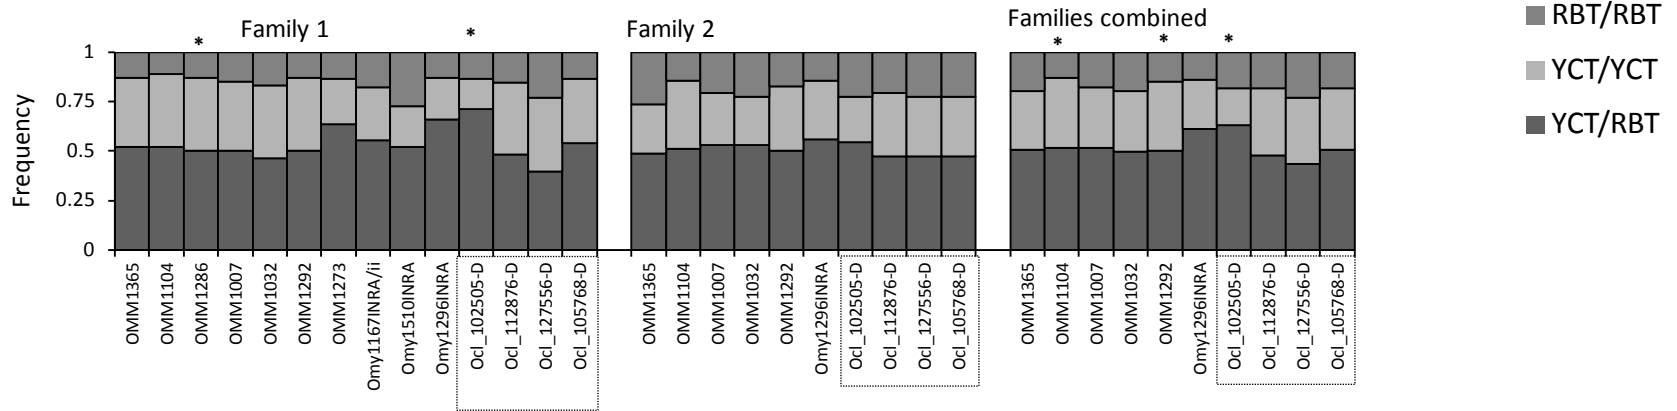

### RYHyb23 (Omy23, RT30)

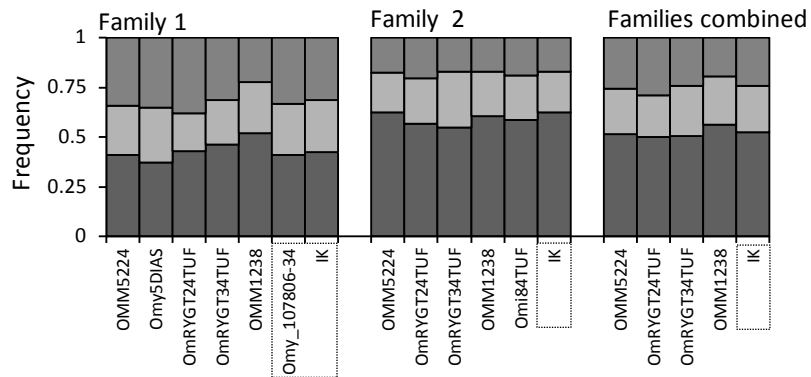

### RYHyb24 (Omy24, RT26)

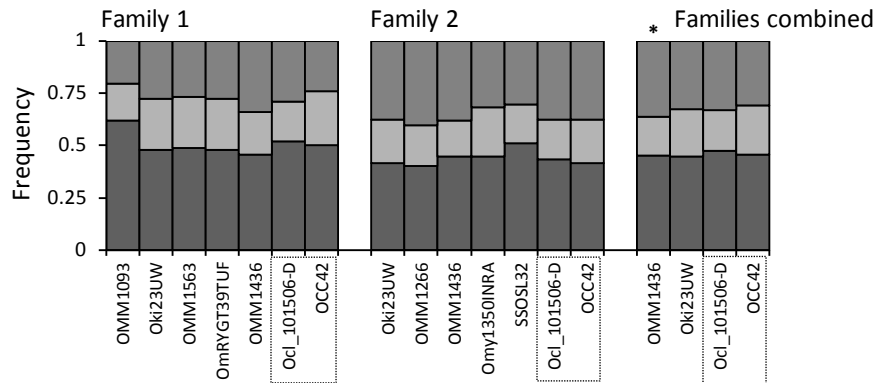



# RYHyb28 (OmySex, RT1)

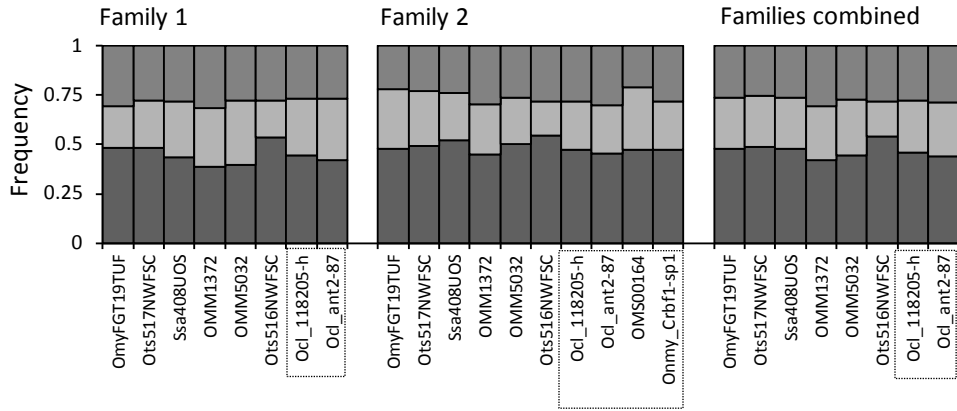

- RBT/RBT
- YCT/YCT
- YCT/RBT
